# Supplementary material
Source: publisher figshare collection journal article supplement (https://rs.figshare.com/ndownloader/files/17842685)
Supplement: Supplementary file 1 [file 17842685]

50	0.99	0.5	1	1	0.03	0.04	0.4	0	10	1	361.59	0.0002
50	0.99	0.5	1	1	0.03	0.04	0.4	0.3	10	1	415.52	0.0004
50	0.99	0.5	1	1	0.03	0.04	0.4	0.4	10	1	428.32	0.0012
50	0.7	0.6	1	1	0.03	0.04	0.4	0.4	10	1	470.65	0.0169
50	0.8	0.7	1	1	0.03	0.04	0.4	0.2	10	1	531.12	0.0127
50	0.8	0.7	1	1	0.03	0.04	0.4	0.4	10	1	536.35	0.0121
50	0.9	0.7	1	1	0.03	0.04	0.4	0.6	10	1	610.81	0.0074
50	0.99	0.5	1	1	0.03	0.04	0.4	0.5	10	1	471.24	0.0016
50	0.8	0.7	1	1	0.03	0.04	0.4	0.5	10	1	566.61	0.0135
50	0.7	0.8	1	1	0.03	0.04	0.4	0.9	10	1	604.7	0.0222
50	0.99	0.5	1	1	0.03	0.04	0.4	0.6	10	1	487.41	0.0015
50	0.99	0.6	1	1	0.03	0.04	0.4	0.2	10	1	468.18	0.0004
50	0.99	0.5	1	1	0.03	0.04	0.4	0.9	10	1	643.94	0.0058
50	0.6	0.01	1	1	0.03	0.04	0.4	0	10	1	298.27	0.0119
50	0.99	0.6	1	1	0.03	0.04	0.4	0.4	10	1	500.6	0.0009
50	0.99	0.4	1	1	0.03	0.04	0.4	0.6	10	1	465.73	0.0022
50	0.99	0.6	1	1	0.03	0.04	0.4	0.3	10	1	486.82	0.0004
50	0.99	0.6	1	1	0.03	0.04	0.4	0.9	10	1	670.04	0.0058
50	0.9	0.8	1	1	0.03	0.04	0.4	0.1	10	1	786.6	0.0081
50	0.99	0.7	1	1	0.03	0.04	0.4	0.8	10	1	705.5	0.0033
50	0.6	0.1	1	1	0.03	0.04	0.4	0.7	10	1	463.69	0.0659
50	0.5	0.7	1	1	0.03	0.04	0.4	0.8	10	1	435.2	0.0217
50	0.5	0.7	1	1	0.03	0.04	0.4	0.7	10	1	442.47	0.0206
50	0.5	0.5	1	1	0.03	0.04	0.4	0.2	10	1	392.44	0.0174
50	0.5	0.6	1	1	0.03	0.04	0.4	0.8	10	1	413.5	0.0192
50	0.6	0.2	1	1	0.03	0.04	0.4	0.3	10	1	364.31	0.0218
50	0.5	0.7	1	1	0.03	0.04	0.4	0.5	10	1	439.89	0.0233
50	0.8	0.4	1	1	0.03	0.04	0.4	0.6	10	1	447.41	0.0168
50	0.3	0.8	1	1	0.03	0.04	0.4	0.9	10	1	375.25	0.0151
50	0.5	0.6	1	1	0.03	0.04	0.4	0.7	10	1	413.01	0.0196
50	0.6	0.1	1	1	0.03	0.04	0.4	0.6	10	1	440.25	0.0525
50	0.3	0.8	1	1	0.03	0.04	0.4	0.8	10	1	376.38	0.0163
50	0.6	0.01	1	1	0.03	0.04	0.4	0.1	10	1	349.61	0.0225
50	0.5	0.5	1	1	0.03	0.04	0.4	0.1	10	1	417.57	0.0198
50	0.5	0.8	1	1	0.03	0.04	0.4	0.9	10	1	487.33	0.0246
50	0.5	0.7	1	1	0.03	0.04	0.4	0	10	1	459.56	0.0321
50	0.5	0.7	1	1	0.03	0.04	0.4	0.9	10	1	445.28	0.0187
50	0.5	0.7	1	1	0.03	0.04	0.4	0.6	10	1	470.15	0.0247
50	0.5	0.6	1	1	0.03	0.04	0.4	0.4	10	1	418.98	0.0213
50	0.5	0.7	1	1	0.03	0.04	0.4	0.3	10	1	440.07	0.0235
50	0.4	0.7	1	1	0.03	0.04	0.4	0.8	10	1	381.7	0.0146
50	0.5	0.6	1	1	0.03	0.04	0.4	0.9	10	1	421.7	0.018
50	0.8	0.8	1	1	0.03	0.04	0.4	0.9	10	1	718.03	0.0198
50	0.99	0.5	1	1	0.03	0.04	0.4	0.1	10	1	365.74	0
50	0.4	0.6	1	1	0.03	0.04	0.4	0.9	10	1	377.15	0.0147
50	0.6	0.01	1	1	0.03	0.04	0.4	0.8	10	1	496.1	0.1899
50	0.6	0.1	1	1	0.03	0.04	0.4	0.8	10	1	472.08	0.0775
50	0.5	0.5	1	1	0.03	0.04	0.4	0.4	10	1	397.84	0.0215
50	0.5	0.6	1	1	0.03	0.04	0.4	0.1	10	1	426.12	0.0243
50	0.5	0.5	1	1	0.03	0.04	0.4	0.5	10	1	400.12	0.0198
50	0.5	0.6	1	1	0.03	0.04	0.4	0.3	10	1	433.71	0.0229
50	0.5	0.5	1	1	0.03	0.04	0.4	0.6	10	1	401.06	0.0191
50	0.99	0.2	1	1	0.03	0.04	0.4	0	10	1	287.28	0.0001
50	0.5	0.6	1	1	0.03	0.04	0.4	0.2	10	1	437.23	0.0228
50	0.5	0.6	1	1	0.03	0.04	0.4	0	10	1	443.79	0.0275
50	0.5	0.5	1	1	0.03	0.04	0.4	0	10	1	419.25	0.0198
50	0.5	0.5	1	1	0.03	0.04	0.4	0.3	10	1	402.02	0.0197
50	0.5	0.7	1	1	0.03	0.04	0.4	0.4	10	1	466.68	0.0266
50	0.4	0.7	1	1	0.03	0.04	0.4	0.9	10	1	404.57	0.0156
50	0.99	0.6	1	1	0.03	0.04	0.4	0	10	1	437.66	0.0004
50	0.99	0.3	1	1	0.03	0.04	0.4	0.1	10	1	326.81	0.0002
50	0.5	0.8	1	1	0.03	0.04	0.4	0.4	10	1	508.28	0.036
50	0.5	0.8	1	1	0.03	0.04	0.4	0.7	10	1	498.5	0.0303
50	0.5	0.8	1	1	0.03	0.04	0.4	0.3	10	1	513.97	0.0426
50	0.4	0.7	1	1	0.03	0.04	0.4	0.7	10	1	403.69	0.0213
50	0.3	0.8	1	1	0.03	0.04	0.4	0.7	10	1	411.93	0.0238
50	0.99	0.5	1	1	0.03	0.04	0.4	0.2	10	1	403.6	0.0008
50	0.5	0.7	1	1	0.03	0.04	0.4	0.2	10	1	468.58	0.0322
50	0.99	0.2	1	1	0.03	0.04	0.4	0.1	10	1	301.44	0
50	0.5	0.8	1	1	0.03	0.04	0.4	0.8	10	1	502.74	0.0248
50	0.3	0.8	1	1	0.03	0.04	0.4	0.6	10	1	419.55	0.027
50	0.99	0.8	1	1	0.03	0.04	0.4	0.1	10	1	767.6	0.0003
50	0.5	0.7	1	1	0.03	0.04	0.4	0.1	10	1	483.87	0.0339
50	0.4	0.7	1	1	0.03	0.04	0.4	0.6	10	1	419.1	0.0226
50	0.4	0.5	1	1	0.03	0.04	0.4	0.9	10	1	365.49	0.0154
50	0.4	0.5	1	1	0.03	0.04	0.4	0.5	10	1	368.93	0.0165
50	0.4	0.6	1	1	0.03	0.04	0.4	0.2	10	1	395.59	0.0243
50	0.4	0.8	1	1	0.03	0.04	0.4	0.9	10	1	437.54	0.0199
50	0.5	0.8	1	1	0.03	0.04	0.4	0.6	10	1	518.3	0.0319
50	0.4	0.6	1	1	0.03	0.04	0.4	0.7	10	1	378.7	0.018
50	0.4	0.8	1	1	0.03	0.04	0.4	0.7	10	1	459.41	0.0278
50	0.9	0.3	1	1	0.03	0.04	0.4	0	10	1	320.29	0.0016
50	0.99	0.3	1	1	0.03	0.04	0.4	0.2	10	1	340.06	0.0005
50	0.4	0.6	1	1	0.03	0.04	0.4	0.8	10	1	381.26	0.0172
50	0.4	0.5	1	1	0.03	0.04	0.4	0.2	10	1	372.25	0.0183
50	0.4	0.5	1	1	0.03	0.04	0.4	0	10	1	391.17	0.0228
50	0.4	0.5	1	1	0.03	0.04	0.4	0.4	10	1	371.42	0.0201
50	0.99	0.4	1	1	0.03	0.04	0.4	0	10	1	330.77	0.0001
50	0.4	0.5	1	1	0.03	0.04	0.4	0.8	10	1	356.89	0.0149
50	0.4	0.7	1	1	0.03	0.04	0.4	0.3	10	1	429.07	0.0301
50	0.6	0.01	1	1	0.03	0.04	0.4	0.5	10	1	458.45	0.104
50	0.6	0.1	1	1	0.03	0.04	0.4	0.4	10	1	415.28	0.0347
50	0.4	0.8	1	1	0.03	0.04	0.4	0.8	10	1	449.46	0.0238
50	0.4	0.5	1	1	0.03	0.04	0.4	0.6	10	1	388.71	0.0193
50	0.4	0.5	1	1	0.03	0.04	0.4	0.3	10	1	385.74	0.0204
50	0.4	0.7	1	1	0.03	0.04	0.4	0.1	10	1	432.99	0.0333
50	0.5	0.8	1	1	0.03	0.04	0.4	0.5	10	1	538.44	0.0342
50	0.4	0.6	1	1	0.03	0.04	0.4	0.6	10	1	393.01	0.0196
50	0.4	0.6	1	1	0.03	0.04	0.4	0.5	10	1	389.85	0.0213
50	0.4	0.4	1	1	0.03	0.04	0.4	0.8	10	1	370.7	0.0206
50	0.99	0.6	1	1	0.03	0.04	0.4	0.5	10	1	507.95	0.0006
50	0.99	0.6	1	1	0.03	0.04	0.4	0.1	10	1	450.52	0.0001
50	0.4	0.5	1	1	0.03	0.04	0.4	0.7	10	1	378.81	0.0189
50	0.9	0.5	1	1	0.03	0.04	0.4	0.1	10	1	387.72	0.0017
50	0.9	0.4	1	1	0.03	0.04	0.4	0	10	1	340.4	0.0016
50	0.99	0.2	1	1	0.03	0.04	0.4	0.2	10	1	331.11	0.0003
50	0.99	0.4	1	1	0.03	0.04	0.4	0.1	10	1	343.89	0.0003
50	0.4	0.5	1	1	0.03	0.04	0.4	0.1	10	1	398.97	0.0227
50	0.4	0.7	1	1	0.03	0.04	0.4	0	10	1	437.52	0.0368
50	0.7	0.4	1	1	0.03	0.04	0.4	0.1	10	1	371.04	0.0104
50	0.4	0.4	1	1	0.03	0.04	0.4	0.9	10	1	377.08	0.0209
50	0.9	0.5	1	1	0.03	0.04	0.4	0	10	1	395.85	0.0022
50	0.4	0.4	1	1	0.03	0.04	0.4	0	10	1	391.33	0.0196
50	0.4	0.4	1	1	0.03	0.04	0.4	0.3	10	1	362.45	0.0171
50	0.4	0.7	1	1	0.03	0.04	0.4	0.5	10	1	443.97	0.0254
50	0.4	0.7	1	1	0.03	0.04	0.4	0.4	10	1	427.59	0.0283
50	0.7	0.4	1	1	0.03	0.04	0.4	0	10	1	377.48	0.0091
50	0.4	0.6	1	1	0.03	0.04	0.4	0.1	10	1	406.13	0.0267
50	0.4	0.6	1	1	0.03	0.04	0.4	0.4	10	1	413.5	0.0231
50	0.99	0.4	1	1	0.03	0.04	0.4	0.2	10	1	359.05	0.0007
50	0.99	0.1	1	1	0.03	0.04	0.4	0	10	1	277.09	0.0003
50	0.7	0.2	1	1	0.03	0.04	0.4	0	10	1	316.35	0.0086
50	0.99	0.1	1	1	0.03	0.04	0.4	0.1	10	1	287.84	0.0005
50	0.4	0.7	1	1	0.03	0.04	0.4	0.2	10	1	448.67	0.032
50	0.4	0.4	1	1	0.03	0.04	0.4	0.2	10	1	376.54	0.0187
50	0.3	0.8	1	1	0.03	0.04	0.4	0.5	10	1	445.5	0.0349
50	0.7	0.5	1	1	0.03	0.04	0.4	0	10	1	406.6	0.0134
50	0.4	0.3	1	1	0.03	0.04	0.4	0.1	10	1	360.89	0.0188
50	0.4	0.3	1	1	0.03	0.04	0.4	0.2	10	1	359.92	0.0189
50	0.4	0.6	1	1	0.03	0.04	0.4	0.3	10	1	413.53	0.0254
50	0.99	0.6	1	1	0.03	0.04	0.4	0.6	10	1	549.33	0.0014
50	0.4	0.8	1	1	0.03	0.04	0.4	0.5	10	1	467.96	0.0341
50	0.8	0.2	1	1	0.03	0.04	0.4	0	10	1	312.42	0.0051
50	0.5	0.9	1	1	0.03	0.04	0.4	0.6	10	1	605.7	0.0531
50	0.9	0.3	1	1	0.03	0.04	0.4	0.1	10	1	349.81	0.0016
50	0.5	0.9	1	1	0.03	0.04	0.4	0.9	10	1	626.19	0.0412
50	0.4	0.4	1	1	0.03	0.04	0.4	0.7	10	1	373.96	0.019
50	0.3	0.8	1	1	0.03	0.04	0.4	0.3	10	1	456.12	0.0419
50	0.3	0.8	1	1	0.03	0.04	0.4	0.2	10	1	468.25	0.048
50	0.8	0.3	1	1	0.03	0.04	0.4	0.1	10	1	354.4	0.0078
50	0.4	0.6	1	1	0.03	0.04	0.4	0	10	1	423.89	0.028
50	0.3	0.7	1	1	0.03	0.04	0.4	0.3	10	1	390	0.027
50	0.5	0.8	1	1	0.03	0.04	0.4	0	10	1	569.02	0.0525
50	0.8	0.4	1	1	0.03	0.04	0.4	0	10	1	364.77	0.0055
50	0.3	0.9	1	1	0.03	0.04	0.4	0.9	10	1	514.3	0.0268
50	0.3	0.8	1	1	0.03	0.04	0.4	0.4	10	1	461.06	0.0359
50	0.7	0.3	1	1	0.03	0.04	0.4	0	10	1	341.86	0.0093
50	0.4	0.4	1	1	0.03	0.04	0.4	0.1	10	1	385.29	0.021
50	0.99	0.4	1	1	0.03	0.04	0.4	0.3	10	1	384.02	0.0004
50	0.4	0.4	1	1	0.03	0.04	0.4	0.4	10	1	381.57	0.0214
50	0.7	0.4	1	1	0.03	0.04	0.4	0.2	10	1	386.86	0.0131
50	0.8	0.1	1	1	0.03	0.04	0.4	0	10	1	292.51	0.0047
50	0.9	0.4	1	1	0.03	0.04	0.4	0.1	10	1	375.84	0.0029
50	0.8	0.3	1	1	0.03	0.04	0.4	0	10	1	354.1	0.0053
50	0.4	0.3	1	1	0.03	0.04	0.4	0	10	1	351.39	0.0155
50	0.7	0.6	1	1	0.03	0.04	0.4	0.3	10	1	449.82	0.0145
50	0.3	0.9	1	1	0.03	0.04	0.4	0.8	10	1	516.09	0.033
50	0.9	0.4	1	1	0.03	0.04	0.4	0.2	10	1	365.25	0.0032
50	0.8	0.4	1	1	0.03	0.04	0.4	0.1	10	1	358.19	0.0062
50	0.5	0.4	1	1	0.03	0.04	0.4	0.3	10	1	383.34	0.0196
50	0.9	0.2	1	1	0.03	0.04	0.4	0	10	1	306.03	0.0014
50	0.5	0.3	1	1	0.03	0.04	0.4	0	10	1	359.13	0.0165
50	0.8	0.4	1	1	0.03	0.04	0.4	0.3	10	1	394.5	0.0098
50	0.9	0.3	1	1	0.03	0.04	0.4	0.2	10	1	349.8	0.0033
50	0.99	0.3	1	1	0.03	0.04	0.4	0.3	10	1	366.48	0.0013
50	0.5	0.4	1	1	0.03	0.04	0.4	0.4	10	1	393.09	0.0196
50	0.8	0.5	1	1	0.03	0.04	0.4	0.2	10	1	423.59	0.0099
50	0.5	0.5	1	1	0.03	0.04	0.4	0.9	10	1	392.04	0.02
50	0.5	0.9	1	1	0.03	0.04	0.4	0.7	10	1	641.37	0.0521
50	0.3	0.8	1	1	0.03	0.04	0.4	0.1	10	1	480.86	0.0584
50	0.3	0.7	1	1	0.03	0.04	0.4	0.8	10	1	356.89	0.0141
50	0.99	0.8	1	1	0.03	0.04	0.4	0.2	10	1	822.15	0.0005
50	0.6	0.5	1	1	0.03	0.04	0.4	0.7	10	1	409.43	0.022
50	0.4	0.4	1	1	0.03	0.04	0.4	0.6	10	1	385.23	0.0233
50	0.5	0.5	1	1	0.03	0.04	0.4	0.8	10	1	399.78	0.0188
50	0.6	0.5	1	1	0.03	0.04	0.4	0	10	1	393.51	0.0147
50	0.3	0.7	1	1	0.03	0.04	0.4	0.5	10	1	396	0.0253
50	0.8	0.5	1	1	0.03	0.04	0.4	0.3	10	1	421.45	0.01
50	0.5	0.9	1	1	0.03	0.04	0.4	0.3	10	1	669.46	0.0785
50	0.3	0.7	1	1	0.03	0.04	0.4	0.4	10	1	400.57	0.0228
50	0.5	0.4	1	1	0.03	0.04	0.4	0.1	10	1	379.37	0.0171
50	0.7	0.5	1	1	0.03	0.04	0.4	0.2	10	1	412.42	0.0133
50	0.4	0.4	1	1	0.03	0.04	0.4	0.5	10	1	379.36	0.0212
50	0.5	0.4	1	1	0.03	0.04	0.4	0.6	10	1	379.53	0.0206
50	0.5	0.6	1	1	0.03	0.04	0.4	0.6	10	1	408.65	0.0185
50	0.6	0.5	1	1	0.03	0.04	0.4	0.5	10	1	405.25	0.0167
50	0.7	0.1	1	1	0.03	0.04	0.4	0	10	1	303.59	0.0083
50	0.6	0.6	1	1	0.03	0.04	0.4	0.2	10	1	433.59	0.0204
50	0.7	0.5	1	1	0.03	0.04	0.4	0.1	10	1	413.28	0.0134
50	0.5	0.4	1	1	0.03	0.04	0.4	0	10	1	385.21	0.0173
50	0.8	0.5	1	1	0.03	0.04	0.4	0	10	1	409.56	0.0058
50	0.7	0.7	1	1	0.03	0.04	0.4	0.8	10	1	499.73	0.0168
50	0.9	0.6	1	1	0.03	0.04	0.4	0	10	1	437.15	0.0025
50	0.6	0.4	1	1	0.03	0.04	0.4	0	10	1	378.76	0.0123
50	0.6	0.5	1	1	0.03	0.04	0.4	0.3	10	1	407.02	0.019
50	0.4	0.8	1	1	0.03	0.04	0.4	0.3	10	1	486.67	0.0401
50	0.9	0.2	1	1	0.03	0.04	0.4	0.1	10	1	319.82	0.002
50	0.5	0.9	1	1	0.03	0.04	0.4	0.4	10	1	685.27	0.0732
50	0.7	0.4	1	1	0.03	0.04	0.4	0.3	10	1	387.84	0.0138
50	0.9	0.5	1	1	0.03	0.04	0.4	0.2	10	1	406.08	0.0031
50	0.5	0.5	1	1	0.03	0.04	0.4	0.7	10	1	398.05	0.0195
50	0.4	0.8	1	1	0.03	0.04	0.4	0.6	10	1	498.39	0.0324
50	0.5	0.3	1	1	0.03	0.04	0.4	0.3	10	1	369.71	0.0195
50	0.8	0.4	1	1	0.03	0.04	0.4	0.2	10	1	402.85	0.009
50	0.7	0.6	1	1	0.03	0.04	0.4	0	10	1	449.84	0.0127
50	0.5	0.9	1	1	0.03	0.04	0.4	0.5	10	1	690.86	0.0645
50	0.8	0.2	1	1	0.03	0.04	0.4	0.1	10	1	346.8	0.0068
50	0.6	0.7	1	1	0.03	0.04	0.4	0.4	10	1	473.38	0.0214
50	0.4	0.3	1	1	0.03	0.04	0.4	0.7	10	1	390.29	0.0259
50	0.3	0.8	1	1	0.03	0.04	0.4	0	10	1	485.85	0.0608
50	0.6	0.6	1	1	0.03	0.04	0.4	0	10	1	437.71	0.0188
50	0.6	0.7	1	1	0.03	0.04	0.4	0.9	10	1	464.54	0.0159
50	0.3	0.6	1	1	0.03	0.04	0.4	0.3	10	1	373.57	0.0229
50	0.5	0.2	1	1	0.03	0.04	0.4	0.1	10	1	360.68	0.0187
50	0.9	0.1	1	1	0.03	0.04	0.4	0	10	1	286.86	0.0019
50	0.8	0.3	1	1	0.03	0.04	0.4	0.2	10	1	384.04	0.0108
50	0.5	0.6	1	1	0.03	0.04	0.4	0.5	10	1	418.55	0.0225
50	0.6	0.4	1	1	0.03	0.04	0.4	0.6	10	1	389.17	0.0226
50	0.7	0.3	1	1	0.03	0.04	0.4	0.1	10	1	359.06	0.0109
50	0.5	0.4	1	1	0.03	0.04	0.4	0.2	10	1	394.69	0.0179
50	0.5	0.4	1	1	0.03	0.04	0.4	0.5	10	1	399.2	0.021
50	0.5	0.4	1	1	0.03	0.04	0.4	0.9	10	1	416.94	0.0257
50	0.7	0.6	1	1	0.03	0.04	0.4	0.2	10	1	469.62	0.0156
50	0.4	0.3	1	1	0.03	0.04	0.4	0.3	10	1	376.11	0.021
50	0.3	0.6	1	1	0.03	0.04	0.4	0.6	10	1	360.92	0.0168
50	0.4	0.3	1	1	0.03	0.04	0.4	0.5	10	1	375.21	0.0217
50	0.7	0.7	1	1	0.03	0.04	0.4	0.4	10	1	513.17	0.0179
50	0.8	0.5	1	1	0.03	0.04	0.4	0.1	10	1	428.39	0.0088
50	0.7	0.3	1	1	0.03	0.04	0.4	0.2	10	1	375.89	0.0136
50	0.4	0.8	1	1	0.03	0.04	0.4	0.1	10	1	499.24	0.0512
50	0.4	0.9	1	1	0.03	0.04	0.4	0.9	10	1	567.98	0.0357
50	0.6	0.2	1	1	0.03	0.04	0.4	0	10	1	347.96	0.0128
50	0.5	0.9	1	1	0.03	0.04	0.4	0.8	10	1	687.48	0.0517
50	0.4	0.8	1	1	0.03	0.04	0.4	0.2	10	1	509.95	0.0485
50	0.4	0.8	1	1	0.03	0.04	0.4	0	10	1	524.62	0.056
50	0.6	0.7	1	1	0.03	0.04	0.4	0.5	10	1	482.25	0.0252
50	0.6	0.7	1	1	0.03	0.04	0.4	0.6	10	1	479.38	0.0209
50	0.8	0.2	1	1	0.03	0.04	0.4	0.2	10	1	359.53	0.0099
50	0.3	0.6	1	1	0.03	0.04	0.4	0.2	10	1	394.13	0.0244
50	0.4	0.8	1	1	0.03	0.04	0.4	0.4	10	1	514.34	0.0431
50	0.4	0.3	1	1	0.03	0.04	0.4	0.8	10	1	403.61	0.0265
50	0.99	0.2	1	1	0.03	0.04	0.4	0.3	10	1	371.74	0.0015
50	0.7	0.5	1	1	0.03	0.04	0.4	0.5	10	1	433.61	0.0173
50	0.8	0.6	1	1	0.03	0.04	0.4	0	10	1	450.48	0.0064
50	0.9	0.6	1	1	0.03	0.04	0.4	0.1	10	1	467.72	0.0036
50	0.7	0.5	1	1	0.03	0.04	0.4	0.4	10	1	431.85	0.0141
50	0.3	0.6	1	1	0.03	0.04	0.4	0.7	10	1	326.45	0.0119
50	0.5	0.3	1	1	0.03	0.04	0.4	0.4	10	1	395.37	0.0207
50	0.6	0.4	1	1	0.03	0.04	0.4	0.1	10	1	386.29	0.0153
50	0.5	0.4	1	1	0.03	0.04	0.4	0.7	10	1	414.4	0.0216
50	0.5	0.9	1	1	0.03	0.04	0.4	0.2	10	1	695.46	0.0876
50	0.6	0.6	1	1	0.03	0.04	0.4	0.7	10	1	434.06	0.0203
50	0.6	0.5	1	1	0.03	0.04	0.4	0.2	10	1	401.21	0.0167
50	0.99	0.7	1	1	0.03	0.04	0.4	0.9	10	1	752.75	0.0034
50	0.5	0.9	1	1	0.03	0.04	0.4	0.1	10	1	691.23	0.0942
50	0.3	0.9	1	1	0.03	0.04	0.4	0.6	10	1	541.84	0.0524
50	0.6	0.5	1	1	0.03	0.04	0.4	0.9	10	1	431.47	0.0204
50	0.9	0.5	1	1	0.03	0.04	0.4	0.4	10	1	452.36	0.0058
50	0.9	0.5	1	1	0.03	0.04	0.4	0.3	10	1	428.09	0.0031
50	0.5	0.2	1	1	0.03	0.04	0.4	0.3	10	1	372.21	0.024
50	0.4	0.3	1	1	0.03	0.04	0.4	0.4	10	1	391.05	0.0239
50	0.6	0.5	1	1	0.03	0.04	0.4	0.6	10	1	428.17	0.0209
50	0.99	0.3	1	1	0.03	0.04	0.4	0.4	10	1	401.57	0.0018
50	0.6	0.5	1	1	0.03	0.04	0.4	0.4	10	1	428.82	0.0165
50	0.8	0.2	1	1	0.03	0.04	0.4	0.3	10	1	370.36	0.012
50	0.8	0.3	1	1	0.03	0.04	0.4	0.3	10	1	399.39	0.0123
50	0.6	0.2	1	1	0.03	0.04	0.4	0.2	10	1	356.35	0.0183
50	0.4	0.3	1	1	0.03	0.04	0.4	0.6	10	1	400.61	0.0266
50	0.5	0.2	1	1	0.03	0.04	0.4	0.2	10	1	373	0.0206
50	0.7	0.9	1	1	0.03	0.04	0.4	0.3	10	1	880.04	0.0595
50	0.5	0.3	1	1	0.03	0.04	0.4	0.1	10	1	373.05	0.0167
50	0.4	0.2	1	1	0.03	0.04	0.4	0.1	10	1	354.32	0.0179
50	0.6	0.3	1	1	0.03	0.04	0.4	0	10	1	360.66	0.0134
50	0.6	0.4	1	1	0.03	0.04	0.4	0.3	10	1	386.86	0.0163
50	0.6	0.2	1	1	0.03	0.04	0.4	0.1	10	1	361.54	0.0154
50	0.7	0.4	1	1	0.03	0.04	0.4	0.4	10	1	406.2	0.0163
50	0.9	0.4	1	1	0.03	0.04	0.4	0.3	10	1	412.88	0.0051
50	0.7	0.6	1	1	0.03	0.04	0.4	0.1	10	1	465.58	0.0152
50	0.4	0.2	1	1	0.03	0.04	0.4	0	10	1	346.18	0.0161
50	0.7	0.6	1	1	0.03	0.04	0.4	0.9	10	1	498.48	0.0216
50	0.9	0.6	1	1	0.03	0.04	0.4	0.2	10	1	480.06	0.004
50	0.4	0.9	1	1	0.03	0.04	0.4	0.8	10	1	589.98	0.0435
50	0.5	0.3	1	1	0.03	0.04	0.4	0.2	10	1	380.79	0.0172
50	0.6	0.6	1	1	0.03	0.04	0.4	0.4	10	1	437.11	0.0192
50	0.6	0.4	1	1	0.03	0.04	0.4	0.5	10	1	416.61	0.0214
50	0.7	0.5	1	1	0.03	0.04	0.4	0.6	10	1	438.81	0.0205
50	0.6	0.6	1	1	0.03	0.04	0.4	0.1	10	1	456.66	0.0211
50	0.6	0.3	1	1	0.03	0.04	0.4	0.1	10	1	359.93	0.0151
50	0.7	0.2	1	1	0.03	0.04	0.4	0.1	10	1	348.52	0.0114
50	0.5	0.4	1	1	0.03	0.04	0.4	0.8	10	1	422.09	0.025
50	0.8	0.6	1	1	0.03	0.04	0.4	0.4	10	1	488.39	0.011
50	0.5	0.9	1	1	0.03	0.04	0.4	0	10	1	706.15	0.097
50	0.5	0.1	1	1	0.03	0.04	0.4	0	10	1	340.28	0.0133
50	0.8	0.5	1	1	0.03	0.04	0.4	0.4	10	1	434.71	0.011
50	0.8	0.4	1	1	0.03	0.04	0.4	0.5	10	1	442.21	0.0138
50	0.99	0.4	1	1	0.03	0.04	0.4	0.4	10	1	400.34	0.0008
50	0.9	0.3	1	1	0.03	0.04	0.4	0.3	10	1	385.13	0.006
50	0.7	0.6	1	1	0.03	0.04	0.4	0.7	10	1	474.67	0.0174
50	0.8	0.6	1	1	0.03	0.04	0.4	0.1	10	1	470.49	0.0097
50	0.4	0.3	1	1	0.03	0.04	0.4	0.9	10	1	393.18	0.0272
50	0.5	0.2	1	1	0.03	0.04	0.4	0.4	10	1	397.53	0.027
50	0.6	0.6	1	1	0.03	0.04	0.4	0.8	10	1	445.97	0.0204
50	0.7	0.7	1	1	0.03	0.04	0.4	0	10	1	525.78	0.0197
50	0.7	0.7	1	1	0.03	0.04	0.4	0.9	10	1	533.58	0.0191
50	0.9	0.2	1	1	0.03	0.04	0.4	0.2	10	1	349.41	0.0045
50	0.7	0.3	1	1	0.03	0.04	0.4	0.3	10	1	378.8	0.0156
50	0.7	0.7	1	1	0.03	0.04	0.4	0.1	10	1	535.72	0.022
50	0.4	0.9	1	1	0.03	0.04	0.4	0.5	10	1	612.15	0.0642
50	0.3	0.6	1	1	0.03	0.04	0.4	0	10	1	417.17	0.0326
50	0.7	0.2	1	1	0.03	0.04	0.4	0.2	10	1	353.65	0.0129
50	0.6	0.5	1	1	0.03	0.04	0.4	0.8	10	1	436.92	0.0223
50	0.8	0.4	1	1	0.03	0.04	0.4	0.4	10	1	425.4	0.0118
50	0.8	0.6	1	1	0.03	0.04	0.4	0.5	10	1	499.25	0.012
50	0.7	0.9	1	1	0.03	0.04	0.4	0.4	10	1	900.77	0.0562
50	0.7	0.1	1	1	0.03	0.04	0.4	0.1	10	1	333.5	0.0116
50	0.4	0.9	1	1	0.03	0.04	0.4	0.7	10	1	601.04	0.0519
50	0.4	0.2	1	1	0.03	0.04	0.4	0.2	10	1	363.64	0.0206
50	0.7	0.5	1	1	0.03	0.04	0.4	0.3	10	1	429.82	0.0151
50	0.8	0.6	1	1	0.03	0.04	0.4	0.2	10	1	479.1	0.0086
50	0.6	0.8	1	1	0.03	0.04	0.4	0.9	10	1	544.24	0.0241
50	0.7	0.5	1	1	0.03	0.04	0.4	0.7	10	1	463.63	0.0216
50	0.9	0.5	1	1	0.03	0.04	0.4	0.5	10	1	463.9	0.0059
50	0.9	0.1	1	1	0.03	0.04	0.4	0.1	10	1	314.7	0.004
50	0.8	0.6	1	1	0.03	0.04	0.4	0.3	10	1	471.34	0.0101
50	0.7	0.7	1	1	0.03	0.04	0.4	0.3	10	1	522.47	0.0176
50	0.6	0.7	1	1	0.03	0.04	0.4	0	10	1	501.72	0.0256
50	0.6	0.4	1	1	0.03	0.04	0.4	0.2	10	1	409.21	0.0169
50	0.7	0.4	1	1	0.03	0.04	0.4	0.8	10	1	434.06	0.0266
50	0.99	0.1	1	1	0.03	0.04	0.4	0.2	10	1	343.38	0.0015
50	0.7	0.7	1	1	0.03	0.04	0.4	0.2	10	1	527.9	0.019
50	0.6	0.5	1	1	0.03	0.04	0.4	0.1	10	1	414.7	0.0175
50	0.6	0.7	1	1	0.03	0.04	0.4	0.7	10	1	487.25	0.0224
50	0.6	0.6	1	1	0.03	0.04	0.4	0.6	10	1	456.97	0.0193
50	0.8	0.7	1	1	0.03	0.04	0.4	0.3	10	1	549.32	0.013
50	0.6	0.6	1	1	0.03	0.04	0.4	0.3	10	1	451.36	0.0209
50	0.7	0.6	1	1	0.03	0.04	0.4	0.8	10	1	489.3	0.0209
50	0.6	0.6	1	1	0.03	0.04	0.4	0.5	10	1	457.74	0.0196
50	0.8	0.6	1	1	0.03	0.04	0.4	0.6	10	1	509.02	0.0134
50	0.8	0.7	1	1	0.03	0.04	0.4	0	10	1	535.64	0.01
50	0.7	0.4	1	1	0.03	0.04	0.4	0.5	10	1	426.77	0.0197
50	0.7	0.7	1	1	0.03	0.04	0.4	0.7	10	1	527.23	0.0194
50	0.7	0.4	1	1	0.03	0.04	0.4	0.7	10	1	437.1	0.0233
50	0.6	0.1	1	1	0.03	0.04	0.4	0	10	1	329.69	0.0115
50	0.3	0.9	1	1	0.03	0.04	0.4	0.7	10	1	552.74	0.0459
50	0.7	0.7	1	1	0.03	0.04	0.4	0.6	10	1	531.09	0.0188
50	0.6	0.4	1	1	0.03	0.04	0.4	0.7	10	1	405.43	0.0223
50	0.5	0.3	1	1	0.03	0.04	0.4	0.5	10	1	388.11	0.0247
50	0.7	0.5	1	1	0.03	0.04	0.4	0.9	10	1	488.66	0.0248
50	0.5	0.1	1	1	0.03	0.04	0.4	0.1	10	1	360.04	0.0197
50	0.3	0.9	1	1	0.03	0.04	0.4	0.3	10	1	555.96	0.0794
50	0.99	0.3	1	1	0.03	0.04	0.4	0	10	1	297.21	0.0003
50	0.6	0.6	1	1	0.03	0.04	0.4	0.9	10	1	460.41	0.0185
50	0.9	0.7	1	1	0.03	0.04	0.4	0.2	10	1	568.73	0.0038
50	0.9	0.6	1	1	0.03	0.04	0.4	0.3	10	1	484.73	0.004
50	0.6	0.7	1	1	0.03	0.04	0.4	0.1	10	1	485.83	0.0265
50	0.6	0.7	1	1	0.03	0.04	0.4	0.3	10	1	527.28	0.0282
50	0.4	0.2	1	1	0.03	0.04	0.4	0.5	10	1	372.74	0.0265
50	0.5	0.3	1	1	0.03	0.04	0.4	0.6	10	1	401.93	0.0281
50	0.99	0.2	1	1	0.03	0.04	0.4	0.4	10	1	414.08	0.0022
50	0.6	0.7	1	1	0.03	0.04	0.4	0.2	10	1	493.91	0.0251
50	0.4	0.2	1	1	0.03	0.04	0.4	0.3	10	1	375.91	0.025
50	0.3	0.9	1	1	0.03	0.04	0.4	0.5	10	1	577.73	0.0644
50	0.9	0.7	1	1	0.03	0.04	0.4	0	10	1	542.51	0.0029
50	0.6	0.99	1	1	0.03	0.04	0.4	0.6	10	1	1221.3	0.1517
50	0.9	0.7	1	1	0.03	0.04	0.4	0.3	10	1	574.12	0.0045
50	0.8	0.1	1	1	0.03	0.04	0.4	0.1	10	1	347.51	0.0096
50	0.6	0.8	1	1	0.03	0.04	0.4	0.8	10	1	555.45	0.028
50	0.6	0.3	1	1	0.03	0.04	0.4	0.2	10	1	382.37	0.0171
50	0.7	0.8	1	1	0.03	0.04	0.4	0.7	10	1	596.31	0.0248
50	0.6	0.7	1	1	0.03	0.04	0.4	0.8	10	1	478.4	0.0211
50	0.9	0.2	1	1	0.03	0.04	0.4	0.3	10	1	370.02	0.0081
50	0.9	0.4	1	1	0.03	0.04	0.4	0.4	10	1	442.53	0.0064
50	0.7	0.3	1	1	0.03	0.04	0.4	0.4	10	1	406.78	0.0171
50	0.4	0.1	1	1	0.03	0.04	0.4	0	10	1	351.93	0.0183
50	0.3	0.6	1	1	0.03	0.04	0.4	0.5	10	1	372.88	0.0193
50	0.9	0.4	1	1	0.03	0.04	0.4	0.6	10	1	474.55	0.0112
50	0.8	0.5	1	1	0.03	0.04	0.4	0.6	10	1	469.25	0.0152
50	0.8	0.6	1	1	0.03	0.04	0.4	0.7	10	1	530.7	0.0156
50	0.99	0.4	1	1	0.03	0.04	0.4	0.5	10	1	445.95	0.0016
50	0.99	0.7	1	1	0.03	0.04	0.4	0	10	1	555.88	0
50	0.8	0.7	1	1	0.03	0.04	0.4	0.1	10	1	572.85	0.0117
50	0.99	0.5	1	1	0.03	0.04	0.4	0.7	10	1	553.18	0.0023
50	0.99	0.7	1	1	0.03	0.04	0.4	0.1	10	1	554.92	0.0001
50	0.5	0.2	1	1	0.03	0.04	0.4	0.5	10	1	395.61	0.0317
50	0.8	0.5	1	1	0.03	0.04	0.4	0.5	10	1	450.73	0.0134
50	0.9	0.7	1	1	0.03	0.04	0.4	0.1	10	1	565.23	0.0043
50	0.6	0.4	1	1	0.03	0.04	0.4	0.4	10	1	430.03	0.0203
50	0.4	0.2	1	1	0.03	0.04	0.4	0.7	10	1	389.22	0.034
50	0.8	0.3	1	1	0.03	0.04	0.4	0.4	10	1	430.7	0.0157
50	0.8	0.2	1	1	0.03	0.04	0.4	0.4	10	1	408.39	0.019
50	0.99	0.7	1	1	0.03	0.04	0.4	0.2	10	1	563.89	0.0002
50	0.4	0.1	1	1	0.03	0.04	0.4	0.1	10	1	361.33	0.0226
50	0.7	0.2	1	1	0.03	0.04	0.4	0.3	10	1	383.48	0.0188
50	0.4	0.2	1	1	0.03	0.04	0.4	0.4	10	1	386.51	0.0253
50	0.3	0.9	1	1	0.03	0.04	0.4	0	10	1	574.38	0.1039
50	0.9	0.6	1	1	0.03	0.04	0.4	0.6	10	1	539.73	0.0077
50	0.3	0.5	1	1	0.03	0.04	0.4	0.7	10	1	338.37	0.0134
50	0.5	0.3	1	1	0.03	0.04	0.4	0.8	10	1	411.88	0.0278
50	0.8	0.5	1	1	0.03	0.04	0.4	0.7	10	1	487	0.0175
50	0.7	0.7	1	1	0.03	0.04	0.4	0.5	10	1	553.25	0.0203
50	0.9	0.5	1	1	0.03	0.04	0.4	0.6	10	1	476.31	0.0078
50	0.6	0.1	1	1	0.03	0.04	0.4	0.1	10	1	351.92	0.0181
50	0.6	0.3	1	1	0.03	0.04	0.4	0.5	10	1	403.27	0.0237
50	0.5	0.3	1	1	0.03	0.04	0.4	0.7	10	1	409.63	0.028
50	0.4	0.9	1	1	0.03	0.04	0.4	0	10	1	628.51	0.1029
50	0.7	0.8	1	1	0.03	0.04	0.4	0.8	10	1	612.73	0.0246
50	0.3	0.9	1	1	0.03	0.04	0.4	0.1	10	1	588.57	0.1009
50	0.6	0.2	1	1	0.03	0.04	0.4	0.4	10	1	405.99	0.0286
50	0.6	0.3	1	1	0.03	0.04	0.4	0.8	10	1	415.26	0.0328
50	0.3	0.9	1	1	0.03	0.04	0.4	0.2	10	1	594.55	0.0954
50	0.99	0.7	1	1	0.03	0.04	0.4	0.3	10	1	577.53	0.0005
50	0.9	0.3	1	1	0.03	0.04	0.4	0.4	10	1	423.27	0.0068
50	0.6	0.8	1	1	0.03	0.04	0.4	0.7	10	1	582.79	0.0289
50	0.9	0.3	1	1	0.03	0.04	0.4	0.5	10	1	429.68	0.0117
50	0.9	0.6	1	1	0.03	0.04	0.4	0.4	10	1	507.09	0.0052
50	0.99	0.3	1	1	0.03	0.04	0.4	0.5	10	1	449.14	0.0037
50	0.6	0.4	1	1	0.03	0.04	0.4	0.8	10	1	435.01	0.0241
50	0.6	0.2	1	1	0.03	0.04	0.4	0.5	10	1	408.45	0.0311
50	0.7	0.3	1	1	0.03	0.04	0.4	0.5	10	1	437.85	0.0243
50	0.5	0.8	1	1	0.03	0.04	0.4	0.2	10	1	538.54	0.042
50	0.4	0.2	1	1	0.03	0.04	0.4	0.6	10	1	390.85	0.0309
50	0.4	0.2	1	1	0.03	0.04	0.4	0.8	10	1	390.14	0.0366
50	0.5	0.2	1	1	0.03	0.04	0.4	0.6	10	1	416.42	0.0369
50	0.4	0.9	1	1	0.03	0.04	0.4	0.4	10	1	625.89	0.0744
50	0.6	0.1	1	1	0.03	0.04	0.4	0.9	10	1	498.37	0.0949
50	0.99	0.5	1	1	0.03	0.04	0.4	0.8	10	1	591.85	0.0044
50	0.6	0.8	1	1	0.03	0.04	0.4	0.2	10	1	570.37	0.0373
50	0.8	0.1	1	1	0.03	0.04	0.4	0.2	10	1	364.07	0.0137
50	0.4	0.2	1	1	0.03	0.04	0.4	0.9	10	1	402.59	0.0373
50	0.7	0.8	1	1	0.03	0.04	0.4	0.5	10	1	613.01	0.0285
50	0.9	0.6	1	1	0.03	0.04	0.4	0.5	10	1	548.14	0.0079
50	0.9	0.4	1	1	0.03	0.04	0.4	0.5	10	1	454.57	0.0077
50	0.9	0.3	1	1	0.03	0.04	0.4	0.6	10	1	467.05	0.0161
50	0.4	0.9	1	1	0.03	0.04	0.4	0.3	10	1	625.92	0.0835
50	0.5	0.1	1	1	0.03	0.04	0.4	0.3	10	1	373.01	0.0286
50	0.5	0.2	1	1	0.03	0.04	0.4	0.7	10	1	440.24	0.0411
50	0.6	0.3	1	1	0.03	0.04	0.4	0.7	10	1	437.44	0.0313
50	0.5	0.2	1	1	0.03	0.04	0.4	0.8	10	1	418.67	0.0417
50	0.7	0.3	1	1	0.03	0.04	0.4	0.8	10	1	455.34	0.0337
50	0.5	0.1	1	1	0.03	0.04	0.4	0.2	10	1	373.38	0.0221
50	0.01	0.99	1	1	0.03	0.04	0.4	0.9	10	1	95.128	0
50	0.99	0.1	1	1	0.03	0.04	0.4	0.3	10	1	384.65	0.0028
50	0.9	0.5	1	1	0.03	0.04	0.4	0.7	10	1	501.03	0.0098
50	0.4	0.1	1	1	0.03	0.04	0.4	0.3	10	1	367.25	0.0257
50	0.8	0.6	1	1	0.03	0.04	0.4	0.9	10	1	538.36	0.017
50	0.6	0.8	1	1	0.03	0.04	0.4	0.4	10	1	569.89	0.0363
50	0.7	0.8	1	1	0.03	0.04	0.4	0.4	10	1	625.53	0.0271
50	0.4	0.1	1	1	0.03	0.04	0.4	0.2	10	1	367.89	0.0237
50	0.9	0.8	1	1	0.03	0.04	0.4	0	10	1	723.4	0.0065
50	0.9	0.1	1	1	0.03	0.04	0.4	0.2	10	1	342.52	0.0047
50	0.8	0.3	1	1	0.03	0.04	0.4	0.5	10	1	439.35	0.0185
50	0.6	0.8	1	1	0.03	0.04	0.4	0.1	10	1	615.99	0.0439
50	0.7	0.8	1	1	0.03	0.04	0.4	0.3	10	1	632.47	0.0294
50	0.5	0.8	1	1	0.03	0.04	0.4	0.1	10	1	571.58	0.0517
50	0.99	0.6	1	1	0.03	0.04	0.4	0.7	10	1	587.33	0.0018
50	0.9	0.6	1	1	0.03	0.04	0.4	0.7	10	1	560.27	0.0101
50	0.99	0.4	1	1	0.03	0.04	0.4	0.7	10	1	538.41	0.0046
50	0.8	0.5	1	1	0.03	0.04	0.4	0.8	10	1	498.32	0.0189
50	0.8	0.7	1	1	0.03	0.04	0.4	0.6	10	1	586.39	0.0163
50	0.4	0.9	1	1	0.03	0.04	0.4	0.2	10	1	645.7	0.0912
50	0.99	0.3	1	1	0.03	0.04	0.4	0.6	10	1	503.09	0.0048
50	0.7	0.8	1	1	0.03	0.04	0.4	0.6	10	1	641.42	0.0254
50	0.3	0.4	1	1	0.03	0.04	0.4	0.5	10	1	337.53	0.0165
50	0.9	0.4	1	1	0.03	0.04	0.4	0.7	10	1	517.29	0.0163
50	0.6	0.3	1	1	0.03	0.04	0.4	0.6	10	1	435.34	0.0295
50	0.6	0.1	1	1	0.03	0.04	0.4	0.3	10	1	381.25	0.0266
50	0.99	0.7	1	1	0.03	0.04	0.4	0.4	10	1	608.69	0.0006
50	0.8	0.6	1	1	0.03	0.04	0.4	0.8	10	1	552	0.0175
50	0.7	0.3	1	1	0.03	0.04	0.4	0.7	10	1	435.75	0.0317
50	0.6	0.1	1	1	0.03	0.04	0.4	0.2	10	1	375.24	0.0225
50	0.8	0.1	1	1	0.03	0.04	0.4	0.3	10	1	367.63	0.0198
50	0.9	0.2	1	1	0.03	0.04	0.4	0.4	10	1	411.61	0.0127
50	0.01	0.99	1	1	0.03	0.04	0.4	0.8	10	1	104.39	0
50	0.9	0.4	1	1	0.03	0.04	0.4	0.8	10	1	530.17	0.0187
50	0.8	0.4	1	1	0.03	0.04	0.4	0.7	10	1	489.44	0.023
50	0.7	0.4	1	1	0.03	0.04	0.4	0.9	10	1	491.7	0.0321
50	0.99	0.6	1	1	0.03	0.04	0.4	0.8	10	1	613.11	0.0025
50	0.8	0.8	1	1	0.03	0.04	0.4	0.8	10	1	674.24	0.0174
50	0.9	0.6	1	1	0.03	0.04	0.4	0.8	10	1	588.73	0.0129
50	0.7	0.2	1	1	0.03	0.04	0.4	0.6	10	1	437.77	0.0351
50	0.7	0.3	1	1	0.03	0.04	0.4	0.6	10	1	456.13	0.0271
50	0.99	0.4	1	1	0.03	0.04	0.4	0.8	10	1	576.27	0.0066
50	0.3	0.6	1	1	0.03	0.04	0.4	0.4	10	1	357.2	0.0207
50	0.5	0.2	1	1	0.03	0.04	0.4	0.9	10	1	462.06	0.0532
50	0.4	0.9	1	1	0.03	0.04	0.4	0.1	10	1	651.91	0.0989
50	0.5	0.1	1	1	0.03	0.04	0.4	0.6	10	1	418.85	0.0507
50	0.9	0.3	1	1	0.03	0.04	0.4	0.7	10	1	528.37	0.0231
50	0.8	0.3	1	1	0.03	0.04	0.4	0.6	10	1	453.67	0.023
50	0.8	0.4	1	1	0.03	0.04	0.4	0.8	10	1	501.01	0.0257
50	0.7	0.1	1	1	0.03	0.04	0.4	0.3	10	1	382.16	0.0241
50	0.5	0.1	1	1	0.03	0.04	0.4	0.4	10	1	403.84	0.0368
50	0.8	0.7	1	1	0.03	0.04	0.4	0.7	10	1	607.91	0.0174
50	0.9	0.1	1	1	0.03	0.04	0.4	0.3	10	1	388.97	0.0101
50	0.8	0.5	1	1	0.03	0.04	0.4	0.9	10	1	532.54	0.0223
50	0.8	0.8	1	1	0.03	0.04	0.4	0.5	10	1	686.56	0.0192
50	0.5	0.1	1	1	0.03	0.04	0.4	0.5	10	1	419.65	0.0402
50	0.8	0.01	1	1	0.03	0.04	0.4	0	10	1	286.56	0.0057
50	0.7	0.2	1	1	0.03	0.04	0.4	0.5	10	1	423.21	0.031
50	0.99	0.7	1	1	0.03	0.04	0.4	0.5	10	1	654	0.0014
50	0.7	0.8	1	1	0.03	0.04	0.4	0	10	1	655.38	0.0368
50	0.7	0.3	1	1	0.03	0.04	0.4	0.9	10	1	502.65	0.0422
50	0.7	0.1	1	1	0.03	0.04	0.4	0.2	10	1	359.37	0.0183
50	0.7	0.2	1	1	0.03	0.04	0.4	0.4	10	1	416.72	0.0268
50	0.8	0.8	1	1	0.03	0.04	0.4	0.7	10	1	694.08	0.0194
50	0.8	0.4	1	1	0.03	0.04	0.4	0.9	10	1	521.4	0.0319
50	0.9	0.4	1	1	0.03	0.04	0.4	0.9	10	1	557.35	0.0239
50	0.6	0.2	1	1	0.03	0.04	0.4	0.6	10	1	429.45	0.0366
50	0.6	0.2	1	1	0.03	0.04	0.4	0.7	10	1	450.33	0.0421
50	0.8	0.2	1	1	0.03	0.04	0.4	0.5	10	1	443.14	0.0247
50	0.6	0.8	1	1	0.03	0.04	0.4	0.3	10	1	610.01	0.0401
50	0.7	0.2	1	1	0.03	0.04	0.4	0.7	10	1	473.8	0.0439
50	0.8	0.2	1	1	0.03	0.04	0.4	0.6	10	1	451.13	0.0291
50	0.9	0.6	1	1	0.03	0.04	0.4	0.9	10	1	633.81	0.0144
50	0.8	0.8	1	1	0.03	0.04	0.4	0.6	10	1	717.01	0.0205
50	0.6	0.9	1	1	0.03	0.04	0.4	0.7	10	1	705.72	0.0508
50	0.1	0.9	1	1	0.03	0.04	0.4	0.9	10	1	248.47	0.003
50	0.01	0.9	1	1	0.03	0.04	0.4	0.9	10	1	109.23	0
50	0.6	0.2	1	1	0.03	0.04	0.4	0.8	10	1	462.84	0.0515
50	0.7	0.8	1	1	0.03	0.04	0.4	0.2	10	1	664.28	0.0349
50	0.9	0.9	1	1	0.03	0.04	0.4	0.3	10	1	1299.4	0.0209
50	0.01	0.99	1	1	0.03	0.04	0.4	0.7	10	1	129.34	0.0001
50	0.3	0.6	1	1	0.03	0.04	0.4	0.9	10	1	344.94	0.0126
50	0.8	0.3	1	1	0.03	0.04	0.4	0.9	10	1	513.98	0.042
50	0.7	0.8	1	1	0.03	0.04	0.4	0.1	10	1	680.98	0.0308
50	0.01	0.9	1	1	0.03	0.04	0.4	0.8	10	1	118.83	0
50	0.99	0.9	1	1	0.03	0.04	0.4	0.2	10	1	1613.6	0.0023
50	0.6	0.8	1	1	0.03	0.04	0.4	0	10	1	622.9	0.0423
50	0.6	0.9	1	1	0.03	0.04	0.4	0.9	10	1	687.71	0.0393
50	0.99	0.01	1	1	0.03	0.04	0.4	0.1	10	1	301.02	0.0005
50	0.7	0.01	1	1	0.03	0.04	0.4	0	10	1	301.19	0.0094
50	0.8	0.9	1	1	0.03	0.04	0.4	0.6	10	1	1008.8	0.036
50	0.01	0.8	1	1	0.03	0.04	0.4	0.9	10	1	120.75	0
50	0.4	0.1	1	1	0.03	0.04	0.4	0.5	10	1	408.69	0.0404
50	0.9	0.2	1	1	0.03	0.04	0.4	0.5	10	1	486.29	0.0193
50	0.8	0.1	1	1	0.03	0.04	0.4	0.4	10	1	434.38	0.0296
50	0.4	0.1	1	1	0.03	0.04	0.4	0.4	10	1	382.18	0.0312
50	0.2	0.5	1	1	0.03	0.04	0.4	0.6	10	1	311.66	0.0106
50	0.9	0.7	1	1	0.03	0.04	0.4	0.7	10	1	621.8	0.0089
50	0.6	0.9	1	1	0.03	0.04	0.4	0.5	10	1	733.46	0.057
50	0.99	0.7	1	1	0.03	0.04	0.4	0.7	10	1	673.68	0.0016
50	0.5	0.1	1	1	0.03	0.04	0.4	0.7	10	1	439.98	0.0602
50	0.6	0.2	1	1	0.03	0.04	0.4	0.9	10	1	461.62	0.0551
50	0.9	0.1	1	1	0.03	0.04	0.4	0.4	10	1	421.51	0.0201
50	0.99	0.7	1	1	0.03	0.04	0.4	0.6	10	1	670.02	0.0011
50	0.2	0.6	1	1	0.03	0.04	0.4	0.1	10	1	379.24	0.0284
50	0.3	0.7	1	1	0.03	0.04	0.4	0.9	10	1	350.37	0.01
50	0.7	0.1	1	1	0.03	0.04	0.4	0.4	10	1	419.94	0.0332
50	0.6	0.9	1	1	0.03	0.04	0.4	0.8	10	1	756.8	0.047
50	0.6	0.9	1	1	0.03	0.04	0.4	0.6	10	1	730.22	0.0589
50	0.99	0.2	1	1	0.03	0.04	0.4	0.5	10	1	458.33	0.0046
50	0.7	0.9	1	1	0.03	0.04	0.4	0.9	10	1	828.46	0.0401
50	0.9	0.2	1	1	0.03	0.04	0.4	0.6	10	1	487.21	0.0261
50	0.4	0.1	1	1	0.03	0.04	0.4	0.6	10	1	418.45	0.0463
50	0.3	0.7	1	1	0.03	0.04	0.4	0.6	10	1	372.91	0.02
50	0.9	0.01	1	1	0.03	0.04	0.4	0	10	1	289.64	0.0019
50	0.9	0.7	1	1	0.03	0.04	0.4	0.8	10	1	641.39	0.0097
50	0.9	0.7	1	1	0.03	0.04	0.4	0.9	10	1	654.75	0.0135
50	0.9	0.7	1	1	0.03	0.04	0.4	0.4	10	1	577.41	0.0055
50	0.5	0.01	1	1	0.03	0.04	0.4	0	10	1	314.46	0.0151
50	0.01	0.9	1	1	0.03	0.04	0.4	0.7	10	1	127.88	0
50	0.7	0.1	1	1	0.03	0.04	0.4	0.6	10	1	452.65	0.056
50	0.8	0.8	1	1	0.03	0.04	0.4	0.2	10	1	683.48	0.0179
50	0.9	0.01	1	1	0.03	0.04	0.4	0.1	10	1	310.12	0.0061
50	0.9	0.8	1	1	0.03	0.04	0.4	0.2	10	1	749.08	0.0084
50	0.5	0.99	1	1	0.03	0.04	0.4	0	10	1	1010.2	0.2263
50	0.01	0.99	1	1	0.03	0.04	0.4	0.6	10	1	162.87	0.0009
50	0.7	0.1	1	1	0.03	0.04	0.4	0.5	10	1	446.43	0.0435
50	0.01	0.9	1	1	0.03	0.04	0.4	0.6	10	1	148.67	0.0008
50	0.8	0.8	1	1	0.03	0.04	0.4	0	10	1	725.15	0.0232
50	0.9	0.7	1	1	0.03	0.04	0.4	0.5	10	1	593.66	0.0064
50	0.5	0.1	1	1	0.03	0.04	0.4	0.8	10	1	456.25	0.0697
50	0.01	0.8	1	1	0.03	0.04	0.4	0.6	10	1	150.22	0.0001
50	0.1	0.8	1	1	0.03	0.04	0.4	0.9	10	1	231.19	0.0019
50	0.3	0.7	1	1	0.03	0.04	0.4	0.7	10	1	381.44	0.0171
50	0.99	0.3	1	1	0.03	0.04	0.4	0.7	10	1	567.83	0.0081
50	0.9	0.2	1	1	0.03	0.04	0.4	0.7	10	1	527.41	0.034
50	0.7	0.01	1	1	0.03	0.04	0.4	0.1	10	1	350.55	0.021
50	0.01	0.5	1	1	0.03	0.04	0.4	0.6	10	1	185.24	0.0001
50	0.01	0.8	1	1	0.03	0.04	0.4	0.8	10	1	127.94	0
50	0.9	0.8	1	1	0.03	0.04	0.4	0.3	10	1	782.18	0.0078
50	0.3	0.7	1	1	0.03	0.04	0.4	0	10	1	450.78	0.0436
50	0.01	0.7	1	1	0.03	0.04	0.4	0.9	10	1	133.73	0
50	0.7	0.6	1	1	0.03	0.04	0.4	0.5	10	1	472.99	0.0157
50	0.5	0.1	1	1	0.03	0.04	0.4	0.9	10	1	470.33	0.081
50	0.01	0.8	1	1	0.03	0.04	0.4	0.7	10	1	138.73	0.0001
50	0.99	0.1	1	1	0.03	0.04	0.4	0.4	10	1	463.57	0.0061
50	0.7	0.1	1	1	0.03	0.04	0.4	0.7	10	1	485.13	0.0703
50	0.6	0.9	1	1	0.03	0.04	0.4	0	10	1	769.46	0.0834
50	0.8	0.1	1	1	0.03	0.04	0.4	0.5	10	1	463.43	0.0416
50	0.01	0.7	1	1	0.03	0.04	0.4	0.7	10	1	155.52	0
50	0.9	0.8	1	1	0.03	0.04	0.4	0.6	10	1	805.27	0.0135
50	0.1	0.8	1	1	0.03	0.04	0.4	0.8	10	1	242.28	0.0028
50	0.7	0.6	1	1	0.03	0.04	0.4	0.6	10	1	486.37	0.0193
50	0.9	0.8	1	1	0.03	0.04	0.4	0.5	10	1	798.67	0.0104
50	0.6	0.01	1	1	0.03	0.04	0.4	0.9	10	1	497.12	0.2189
50	0.7	0.9	1	1	0.03	0.04	0.4	0.7	10	1	824.29	0.0494
50	0.9	0.8	1	1	0.03	0.04	0.4	0.4	10	1	783.33	0.0083
50	0.1	0.7	1	1	0.03	0.04	0.4	0.9	10	1	214.98	0.0013
50	0.5	0.2	1	1	0.03	0.04	0.4	0	10	1	352.22	0.0165
50	0.01	0.7	1	1	0.03	0.04	0.4	0.5	10	1	183.32	0.0006
50	0.01	0.9	1	1	0.03	0.04	0.4	0.5	10	1	184.51	0.0013
50	0.01	0.8	1	1	0.03	0.04	0.4	0.5	10	1	179.87	0.001
50	0.01	0.7	1	1	0.03	0.04	0.4	0.6	10	1	169.44	0.0005
50	0.01	0.5	1	1	0.03	0.04	0.4	0.7	10	1	166.4	0.0001
50	0.01	0.7	1	1	0.03	0.04	0.4	0.8	10	1	138.04	0
50	0.99	0.2	1	1	0.03	0.04	0.4	0.6	10	1	532.5	0.0091
50	0.6	0.9	1	1	0.03	0.04	0.4	0.3	10	1	745.89	0.0705
50	0.7	0.9	1	1	0.03	0.04	0.4	0.8	10	1	829.62	0.0416
50	0.01	0.4	1	1	0.03	0.04	0.4	0.5	10	1	208.76	0.0007
50	0.8	0.1	1	1	0.03	0.04	0.4	0.9	10	1	552.83	0.1106
50	0.9	0.1	1	1	0.03	0.04	0.4	0.5	10	1	503.51	0.033
50	0.01	0.3	1	1	0.03	0.04	0.4	0.9	10	1	172.43	0
50	0.99	0.8	1	1	0.03	0.04	0.4	0.4	10	1	820.99	0.0008
50	0.2	0.4	1	1	0.03	0.04	0.4	0.1	10	1	359.94	0.022
50	0.8	0.8	1	1	0.03	0.04	0.4	0.1	10	1	728.62	0.0229
50	0.1	0.7	1	1	0.03	0.04	0.4	0.8	10	1	239.46	0.0027
50	0.4	0.1	1	1	0.03	0.04	0.4	0.7	10	1	449.72	0.0568
50	0.6	0.9	1	1	0.03	0.04	0.4	0.2	10	1	752.45	0.0776
50	0.2	0.4	1	1	0.03	0.04	0.4	0.9	10	1	300.9	0.0066
50	0.99	0.8	1	1	0.03	0.04	0.4	0.3	10	1	823.46	0.0008
50	0.99	0.8	1	1	0.03	0.04	0.4	0	10	1	787.9	0.0003
50	0.3	0.5	1	1	0.03	0.04	0.4	0.6	10	1	340.81	0.0143
50	0.8	0.1	1	1	0.03	0.04	0.4	0.6	10	1	494.22	0.0529
50	0.01	0.4	1	1	0.03	0.04	0.4	0.8	10	1	173.07	0.0001
50	0.3	0.6	1	1	0.03	0.04	0.4	0.8	10	1	343.01	0.0119
50	0.4	0.01	1	1	0.03	0.04	0.4	0.1	10	1	353.85	0.0267
50	0.99	0.3	1	1	0.03	0.04	0.4	0.8	10	1	642.6	0.0134
50	0.01	0.4	1	1	0.03	0.04	0.4	0.9	10	1	163.44	0
50	0.1	0.9	1	1	0.03	0.04	0.4	0.8	10	1	292.57	0.0076
50	0.4	0.1	1	1	0.03	0.04	0.4	0.9	10	1	461.04	0.0699
50	0.4	0.1	1	1	0.03	0.04	0.4	0.8	10	1	452.97	0.0645
50	0.9	0.3	1	1	0.03	0.04	0.4	0.8	10	1	545.64	0.028
50	0.3	0.5	1	1	0.03	0.04	0.4	0.9	10	1	341.29	0.0132
50	0.6	0.9	1	1	0.03	0.04	0.4	0.1	10	1	784.05	0.0831
50	0.99	0.01	1	1	0.03	0.04	0.4	0.2	10	1	381.81	0.0048
50	0.5	0.01	1	1	0.03	0.04	0.4	0.1	10	1	351.43	0.0261
50	0.9	0.3	1	1	0.03	0.04	0.4	0.9	10	1	566.6	0.04
50	0.6	0.9	1	1	0.03	0.04	0.4	0.4	10	1	788.98	0.0697
50	0.3	0.5	1	1	0.03	0.04	0.4	0.4	10	1	369.36	0.0201
50	0.01	0.9	1	1	0.03	0.04	0.4	0.4	10	1	228.02	0.0057
50	0.3	0.5	1	1	0.03	0.04	0.4	0.1	10	1	382.48	0.0223
50	0.8	0.2	1	1	0.03	0.04	0.4	0.8	10	1	524.98	0.0541
50	0.01	0.6	1	1	0.03	0.04	0.4	0.9	10	1	144.5	0
50	0.4	0.01	1	1	0.03	0.04	0.4	0	10	1	343.43	0.0193
50	0.9	0.9	1	1	0.03	0.04	0.4	0.9	10	1	1233	0.0193
50	0.8	0.2	1	1	0.03	0.04	0.4	0.7	10	1	512.26	0.0443
50	0.1	0.6	1	1	0.03	0.04	0.4	0.5	10	1	282.91	0.0077
50	0.4	0.99	1	1	0.03	0.04	0.4	0.1	10	1	862.2	0.2112
50	0.01	0.6	1	1	0.03	0.04	0.4	0.8	10	1	154.39	0
50	0.01	0.5	1	1	0.03	0.04	0.4	0.5	10	1	203.96	0.0008
50	0.4	0.01	1	1	0.03	0.04	0.4	0.2	10	1	373.07	0.0399
50	0.3	0.5	1	1	0.03	0.04	0.4	0.5	10	1	360.93	0.0154
50	0.3	0.6	1	1	0.03	0.04	0.4	0.1	10	1	402.46	0.0314
50	0.8	0.2	1	1	0.03	0.04	0.4	0.9	10	1	574.59	0.0735
50	0.5	0.99	1	1	0.03	0.04	0.4	0.9	10	1	1165.3	0.1251
50	0.1	0.8	1	1	0.03	0.04	0.4	0.6	10	1	293.31	0.0094
50	0.01	0.6	1	1	0.03	0.04	0.4	0.7	10	1	161.97	0
50	0.3	0.99	1	1	0.03	0.04	0.4	0.1	10	1	806.7	0.2163
50	0.8	0.9	1	1	0.03	0.04	0.4	0.9	10	1	992.11	0.0321
50	0.6	0.3	1	1	0.03	0.04	0.4	0.4	10	1	390.68	0.0216
50	0.01	0.3	1	1	0.03	0.04	0.4	0.5	10	1	220.72	0.0006
50	0.9	0.2	1	1	0.03	0.04	0.4	0.8	10	1	580.88	0.0505
50	0.6	0.8	1	1	0.03	0.04	0.4	0.5	10	1	542.33	0.0299
50	0.9	0.8	1	1	0.03	0.04	0.4	0.8	10	1	831.43	0.0128
50	0.3	0.99	1	1	0.03	0.04	0.4	0	10	1	825.63	0.2352
50	0.3	0.7	1	1	0.03	0.04	0.4	0.1	10	1	427.35	0.0342
50	0.7	0.1	1	1	0.03	0.04	0.4	0.9	10	1	491.51	0.0987
50	0.9	0.8	1	1	0.03	0.04	0.4	0.7	10	1	827.36	0.009
50	0.6	0.3	1	1	0.03	0.04	0.4	0.3	10	1	389.34	0.02
50	0.9	0.8	1	1	0.03	0.04	0.4	0.9	10	1	841.28	0.0128
50	0.7	0.1	1	1	0.03	0.04	0.4	0.8	10	1	491.05	0.0846
50	0.2	0.7	1	1	0.03	0.04	0.4	0.8	10	1	279.91	0.0077
50	0.01	0.5	1	1	0.03	0.04	0.4	0.8	10	1	155.02	0
50	0.01	0.5	1	1	0.03	0.04	0.4	0.9	10	1	152.33	0
50	0.01	0.3	1	1	0.03	0.04	0.4	0.6	10	1	204.78	0.0004
50	0.4	0.99	1	1	0.03	0.04	0.4	0.2	10	1	911.61	0.2075
50	0.2	0.4	1	1	0.03	0.04	0.4	0.6	10	1	320.7	0.011
50	0.2	0.3	1	1	0.03	0.04	0.4	0.8	10	1	329.04	0.0126
50	0.4	0.99	1	1	0.03	0.04	0.4	0	10	1	884.4	0.2262
50	0.5	0.01	1	1	0.03	0.04	0.4	0.2	10	1	400.43	0.0418
50	0.3	0.99	1	1	0.03	0.04	0.4	0.2	10	1	829.22	0.2067
50	0.5	0.3	1	1	0.03	0.04	0.4	0.9	10	1	443.15	0.0363
50	0.01	0.8	1	1	0.03	0.04	0.4	0.4	10	1	195.82	0.0025
50	0.1	0.8	1	1	0.03	0.04	0.4	0.7	10	1	264.19	0.0036
50	0.2	0.5	1	1	0.03	0.04	0.4	0.7	10	1	301.15	0.0088
50	0.2	0.5	1	1	0.03	0.04	0.4	0.5	10	1	327.11	0.0135
50	0.01	0.6	1	1	0.03	0.04	0.4	0.5	10	1	185.19	0.0005
50	0.01	0.6	1	1	0.03	0.04	0.4	0.6	10	1	175.87	0.0004
50	0.99	0.8	1	1	0.03	0.04	0.4	0.5	10	1	861.39	0.0015
50	0.7	0.9	1	1	0.03	0.04	0.4	0.2	10	1	862.71	0.0623
50	0.9	0.2	1	1	0.03	0.04	0.4	0.9	10	1	618.26	0.0677
50	0.99	0.1	1	1	0.03	0.04	0.4	0.5	10	1	529.38	0.0126
50	0.8	0.1	1	1	0.03	0.04	0.4	0.8	10	1	516.87	0.0884
50	0.1	0.2	1	1	0.03	0.04	0.4	0.8	10	1	290.56	0.009
50	0.6	0.8	1	1	0.03	0.04	0.4	0.6	10	1	593.57	0.0339
50	0.1	0.6	1	1	0.03	0.04	0.4	0.9	10	1	221.99	0.0011
50	0.7	0.9	1	1	0.03	0.04	0.4	0.1	10	1	873.58	0.0635
50	0.01	0.4	1	1	0.03	0.04	0.4	0.7	10	1	177.33	0.0002
50	0.7	0.9	1	1	0.03	0.04	0.4	0.5	10	1	883.67	0.0543
50	0.01	0.99	1	1	0.03	0.04	0.4	0.5	10	1	237.63	0.0062
50	0.99	0.8	1	1	0.03	0.04	0.4	0.7	10	1	918.68	0.0017
50	0.7	0.9	1	1	0.03	0.04	0.4	0.6	10	1	889.32	0.0541
50	0.2	0.8	1	1	0.03	0.04	0.4	0.8	10	1	330.1	0.0111
50	0.1	0.7	1	1	0.03	0.04	0.4	0.4	10	1	313.23	0.0154
50	0.3	0.5	1	1	0.03	0.04	0.4	0	10	1	378.52	0.0251
50	0.1	0.7	1	1	0.03	0.04	0.4	0.7	10	1	247.34	0.0044
50	0.2	0.8	1	1	0.03	0.04	0.4	0.3	10	1	418.53	0.0402
50	0.2	0.7	1	1	0.03	0.04	0.4	0.7	10	1	313.91	0.011
50	0.01	0.6	1	1	0.03	0.04	0.4	0.2	10	1	253.25	0.0073
50	0.3	0.3	1	1	0.03	0.04	0.4	0	10	1	376.55	0.0202
50	0.99	0.8	1	1	0.03	0.04	0.4	0.6	10	1	887.71	0.0013
50	0.9	0.1	1	1	0.03	0.04	0.4	0.6	10	1	535.3	0.0465
50	0.99	0.3	1	1	0.03	0.04	0.4	0.9	10	1	725.5	0.023
50	0.1	0.6	1	1	0.03	0.04	0.4	0.8	10	1	243.8	0.0026
50	0.8	0.01	1	1	0.03	0.04	0.4	0.1	10	1	333.82	0.0134
50	0.5	0.01	1	1	0.03	0.04	0.4	0.3	10	1	410.55	0.0599
50	0.8	0.1	1	1	0.03	0.04	0.4	0.7	10	1	533.49	0.0746
50	0.3	0.7	1	1	0.03	0.04	0.4	0.2	10	1	411.93	0.0337
50	0.01	0.7	1	1	0.03	0.04	0.4	0.4	10	1	196.64	0.0028
50	0.01	0.8	1	1	0.03	0.04	0.4	0.3	10	1	237.92	0.008
50	0.01	0.4	1	1	0.03	0.04	0.4	0.6	10	1	197.21	0.0006
50	0.6	0.01	1	1	0.03	0.04	0.4	0.3	10	1	412.13	0.059
50	0.2	0.1	1	1	0.03	0.04	0.4	0.3	10	1	368.47	0.0265
50	0.7	0.9	1	1	0.03	0.04	0.4	0	10	1	881.82	0.0683
50	0.1	0.8	1	1	0.03	0.04	0.4	0.5	10	1	320.33	0.0161
50	0.2	0.7	1	1	0.03	0.04	0.4	0.6	10	1	329.76	0.0144
50	0.01	0.2	1	1	0.03	0.04	0.4	0.7	10	1	198.43	0.0002
50	0.8	0.7	1	1	0.03	0.04	0.4	0.8	10	1	577.82	0.0168
50	0.2	0.7	1	1	0.03	0.04	0.4	0.9	10	1	278.11	0.0064
50	0.3	0.5	1	1	0.03	0.04	0.4	0.8	10	1	331.59	0.0132
50	0.3	0.2	1	1	0.03	0.04	0.4	0.1	10	1	353.33	0.0216
50	0.2	0.7	1	1	0.03	0.04	0.4	0.5	10	1	340.34	0.0169
50	0.9	0.1	1	1	0.03	0.04	0.4	0.7	10	1	560.24	0.0709
50	0.01	0.3	1	1	0.03	0.04	0.4	0.8	10	1	179.73	0
50	0.2	0.6	1	1	0.03	0.04	0.4	0.9	10	1	297.23	0.0068
50	0.1	0.6	1	1	0.03	0.04	0.4	0.2	10	1	329.36	0.0174
50	0.9	0.5	1	1	0.03	0.04	0.4	0.8	10	1	546.94	0.0143
50	0.3	0.99	1	1	0.03	0.04	0.4	0.3	10	1	901.22	0.2044
50	0.01	0.1	1	1	0.03	0.04	0.4	0.7	10	1	235.31	0.0008
50	0.4	0.99	1	1	0.03	0.04	0.4	0.3	10	1	940.66	0.1964
50	0.99	0.01	1	1	0.03	0.04	0.4	0.9	10	1	480.17	0.2853
50	0.2	0.8	1	1	0.03	0.04	0.4	0.7	10	1	352	0.016
50	0.99	0.2	1	1	0.03	0.04	0.4	0.7	10	1	617.72	0.0167
50	0.1	0.4	1	1	0.03	0.04	0.4	0.5	10	1	295.29	0.0076
50	0.01	0.4	1	1	0.03	0.04	0.4	0.2	10	1	259.22	0.0076
50	0.8	0.01	1	1	0.03	0.04	0.4	0.2	10	1	374.09	0.0262
50	0.2	0.3	1	1	0.03	0.04	0.4	0.4	10	1	348.91	0.0165
50	0.8	0.7	1	1	0.03	0.04	0.4	0.9	10	1	606.89	0.0189
50	0.2	0.8	1	1	0.03	0.04	0.4	0.9	10	1	323.85	0.0078
50	0.1	0.8	1	1	0.03	0.04	0.4	0.4	10	1	335.17	0.021
50	0.3	0.4	1	1	0.03	0.04	0.4	0.8	10	1	334.61	0.015
50	0.4	0.9	1	1	0.03	0.04	0.4	0.6	10	1	649.39	0.0637
50	0.5	0.01	1	1	0.03	0.04	0.4	0.9	10	1	481.33	0.1954
50	0.3	0.99	1	1	0.03	0.04	0.4	0.4	10	1	919.21	0.186
50	0.3	0.4	1	1	0.03	0.04	0.4	0.7	10	1	341.95	0.0147
50	0.4	0.99	1	1	0.03	0.04	0.4	0.4	10	1	959.95	0.1872
50	0.1	0.7	1	1	0.03	0.04	0.4	0.6	10	1	266.91	0.0064
50	0.6	0.01	1	1	0.03	0.04	0.4	0.2	10	1	403.04	0.0419
50	0.3	0.2	1	1	0.03	0.04	0.4	0	10	1	371.17	0.0192
50	0.1	0.5	1	1	0.03	0.04	0.4	0.8	10	1	239.73	0.0025
50	0.2	0.5	1	1	0.03	0.04	0.4	0.9	10	1	294.51	0.0072
50	0.6	0.01	1	1	0.03	0.04	0.4	0.4	10	1	439.37	0.0784
50	0.1	0.6	1	1	0.03	0.04	0.4	0.7	10	1	246.84	0.0035
50	0.5	0.99	1	1	0.03	0.04	0.4	0.4	10	1	1031	0.1823
50	0.01	0.6	1	1	0.03	0.04	0.4	0.4	10	1	208.66	0.0024
50	0.99	0.1	1	1	0.03	0.04	0.4	0.6	10	1	629.33	0.0258
50	0.1	0.6	1	1	0.03	0.04	0.4	0.1	10	1	336.84	0.0269
50	0.2	0.8	1	1	0.03	0.04	0.4	0.5	10	1	390.62	0.0274
50	0.2	0.9	1	1	0.03	0.04	0.4	0.9	10	1	399.59	0.0142
50	0.2	0.6	1	1	0.03	0.04	0.4	0.8	10	1	293.26	0.0066
50	0.1	0.7	1	1	0.03	0.04	0.4	0.1	10	1	348.14	0.0352
50	0.8	0.8	1	1	0.03	0.04	0.4	0.3	10	1	683.5	0.0205
50	0.01	0.3	1	1	0.03	0.04	0.4	0.7	10	1	194.04	0.0003
50	0.2	0.6	1	1	0.03	0.04	0.4	0.4	10	1	333.04	0.016
50	0.3	0.4	1	1	0.03	0.04	0.4	0	10	1	355.88	0.0219
50	0.2	0.5	1	1	0.03	0.04	0.4	0.8	10	1	299.65	0.0086
50	0.8	0.8	1	1	0.03	0.04	0.4	0.4	10	1	685.88	0.0201
50	0.1	0.6	1	1	0.03	0.04	0.4	0.3	10	1	307.83	0.0161
50	0.4	0.01	1	1	0.03	0.04	0.4	0.9	10	1	480.51	0.1797
50	0.1	0.9	1	1	0.03	0.04	0.4	0.7	10	1	321.36	0.0116
50	0.01	0.2	1	1	0.03	0.04	0.4	0	10	1	316.92	0.0122
50	0.99	0.01	1	1	0.03	0.04	0.4	0	10	1	248.55	0.0001
50	0.1	0.6	1	1	0.03	0.04	0.4	0.6	10	1	269.14	0.007
50	0.01	0.6	1	1	0.03	0.04	0.4	0.3	10	1	227.61	0.0035
50	0.3	0.5	1	1	0.03	0.04	0.4	0.2	10	1	364.09	0.0192
50	0.1	0.7	1	1	0.03	0.04	0.4	0.2	10	1	361.53	0.0286
50	0.2	0.6	1	1	0.03	0.04	0.4	0.7	10	1	305.88	0.0075
50	0.3	0.4	1	1	0.03	0.04	0.4	0.4	10	1	353.88	0.0174
50	0.1	0.5	1	1	0.03	0.04	0.4	0.9	10	1	227.38	0.0022
50	0.01	0.2	1	1	0.03	0.04	0.4	0.9	10	1	179.82	0
50	0.2	0.4	1	1	0.03	0.04	0.4	0.8	10	1	297.64	0.0088
50	0.8	0.9	1	1	0.03	0.04	0.4	0.7	10	1	971.7	0.0347
50	0.1	0.7	1	1	0.03	0.04	0.4	0.3	10	1	333.37	0.0217
50	0.01	0.7	1	1	0.03	0.04	0.4	0.3	10	1	245.98	0.0059
50	0.9	0.5	1	1	0.03	0.04	0.4	0.9	10	1	595.28	0.0185
50	0.2	0.6	1	1	0.03	0.04	0.4	0.5	10	1	327.38	0.0126
50	0.2	0.6	1	1	0.03	0.04	0.4	0.6	10	1	308.87	0.0127
50	0.2	0.4	1	1	0.03	0.04	0.4	0.3	10	1	332.2	0.0178
50	0.2	0.8	1	1	0.03	0.04	0.4	0.4	10	1	382.43	0.0296
50	0.2	0.9	1	1	0.03	0.04	0.4	0.6	10	1	466.06	0.0387
50	0.5	0.99	1	1	0.03	0.04	0.4	0.2	10	1	994.21	0.1993
50	0.3	0.5	1	1	0.03	0.04	0.4	0.3	10	1	369.46	0.0202
50	0.4	0.99	1	1	0.03	0.04	0.4	0.8	10	1	1041.4	0.1318
50	0.99	0.8	1	1	0.03	0.04	0.4	0.8	10	1	956.42	0.0027
50	0.1	0.5	1	1	0.03	0.04	0.4	0.7	10	1	251.44	0.0038
50	0.5	0.99	1	1	0.03	0.04	0.4	0.1	10	1	1011.4	0.2107
50	0.2	0.9	1	1	0.03	0.04	0.4	0.3	10	1	518.92	0.0766
50	0.1	0.4	1	1	0.03	0.04	0.4	0.8	10	1	248.87	0.003
50	0.3	0.99	1	1	0.03	0.04	0.4	0.5	10	1	922.34	0.1677
50	0.2	0.3	1	1	0.03	0.04	0.4	0.5	10	1	340.95	0.016
50	0.2	0.5	1	1	0.03	0.04	0.4	0.1	10	1	354.31	0.022
50	0.1	0.6	1	1	0.03	0.04	0.4	0	10	1	359.29	0.0325
50	0.01	0.4	1	1	0.03	0.04	0.4	0.4	10	1	225.1	0.0012
50	0.8	0.9	1	1	0.03	0.04	0.4	0.8	10	1	991.62	0.0336
50	0.2	0.8	1	1	0.03	0.04	0.4	0.6	10	1	374.9	0.0204
50	0.2	0.9	1	1	0.03	0.04	0.4	0.8	10	1	412.39	0.018
50	0.4	0.99	1	1	0.03	0.04	0.4	0.7	10	1	1049.8	0.1495
50	0.5	0.99	1	1	0.03	0.04	0.4	0.5	10	1	1095.7	0.1756
50	0.8	0.9	1	1	0.03	0.04	0.4	0.4	10	1	970.03	0.0402
50	0.1	0.3	1	1	0.03	0.04	0.4	0.5	10	1	303.89	0.0093
50	0.4	0.99	1	1	0.03	0.04	0.4	0.9	10	1	1058.5	0.1178
50	0.01	0.5	1	1	0.03	0.04	0.4	0.4	10	1	220.02	0.0009
50	0.3	0.99	1	1	0.03	0.04	0.4	0.6	10	1	953.48	0.1535
50	0.3	0.4	1	1	0.03	0.04	0.4	0.2	10	1	376.77	0.0225
50	0.2	0.99	1	1	0.03	0.04	0.4	0.4	10	1	864.2	0.1791
50	0.6	0.99	1	1	0.03	0.04	0.4	0.9	10	1	1294.8	0.1311
50	0.2	0.3	1	1	0.03	0.04	0.4	0.6	10	1	336.53	0.016
50	0.8	0.3	1	1	0.03	0.04	0.4	0.7	10	1	467.78	0.0277
50	0.1	0.4	1	1	0.03	0.04	0.4	0.9	10	1	244.81	0.0026
50	0.2	0.7	1	1	0.03	0.04	0.4	0.4	10	1	356.17	0.0206
50	0.01	0.2	1	1	0.03	0.04	0.4	0.6	10	1	211.36	0.0005
50	0.4	0.01	1	1	0.03	0.04	0.4	0.7	10	1	458.6	0.1322
50	0.4	0.99	1	1	0.03	0.04	0.4	0.5	10	1	1005.4	0.1773
50	0.2	0.4	1	1	0.03	0.04	0.4	0.5	10	1	313.18	0.0116
50	0.01	0.7	1	1	0.03	0.04	0.4	0.2	10	1	269.46	0.0107
50	0.8	0.9	1	1	0.03	0.04	0.4	0.3	10	1	996.79	0.0393
50	0.9	0.1	1	1	0.03	0.04	0.4	0.8	10	1	590.07	0.0966
50	0.1	0.7	1	1	0.03	0.04	0.4	0.5	10	1	299.8	0.011
50	0.99	0.8	1	1	0.03	0.04	0.4	0.9	10	1	998.96	0.0027
50	0.8	0.9	1	1	0.03	0.04	0.4	0.5	10	1	1000	0.0401
50	0.6	0.01	1	1	0.03	0.04	0.4	0.7	10	1	472.41	0.1564
50	0.3	0.2	1	1	0.03	0.04	0.4	0.4	10	1	363.48	0.0228
50	0.1	0.4	1	1	0.03	0.04	0.4	0.4	10	1	299.69	0.0087
50	0.4	0.99	1	1	0.03	0.04	0.4	0.6	10	1	1002.7	0.1599
50	0.5	0.99	1	1	0.03	0.04	0.4	0.8	10	1	1125.9	0.1358
50	0.01	0.5	1	1	0.03	0.04	0.4	0.2	10	1	267.15	0.0077
50	0.3	0.99	1	1	0.03	0.04	0.4	0.8	10	1	1026	0.1164
50	0.1	0.5	1	1	0.03	0.04	0.4	0.6	10	1	270.24	0.0051
50	0.4	0.01	1	1	0.03	0.04	0.4	0.8	10	1	467.74	0.1536
50	0.01	0.4	1	1	0.03	0.04	0.4	0.3	10	1	236.88	0.0031
50	0.3	0.99	1	1	0.03	0.04	0.4	0.9	10	1	1012.4	0.0962
50	0.01	0.2	1	1	0.03	0.04	0.4	0.8	10	1	195.23	0.0001
50	0.2	0.4	1	1	0.03	0.04	0.4	0.4	10	1	340.45	0.0146
50	0.2	0.6	1	1	0.03	0.04	0.4	0.3	10	1	351.61	0.0216
50	0.8	0.01	1	1	0.03	0.04	0.4	0.7	10	1	486.4	0.1777
50	0.01	0.9	1	1	0.03	0.04	0.4	0.3	10	1	277.39	0.0169
50	0.2	0.8	1	1	0.03	0.04	0.4	0.2	10	1	440.95	0.0511
50	0.2	0.7	1	1	0.03	0.04	0.4	0.3	10	1	381.39	0.0278
50	0.3	0.4	1	1	0.03	0.04	0.4	0.6	10	1	369.28	0.0175
50	0.3	0.1	1	1	0.03	0.04	0.4	0.4	10	1	376.11	0.0329
50	0.01	0.5	1	1	0.03	0.04	0.4	0.1	10	1	293.78	0.0129
50	0.5	0.99	1	1	0.03	0.04	0.4	0.6	10	1	1081.4	0.1596
50	0.01	0.99	1	1	0.03	0.04	0.4	0.4	10	1	387.33	0.0292
50	0.9	0.01	1	1	0.03	0.04	0.4	0.9	10	1	480.28	0.26
50	0.5	0.01	1	1	0.03	0.04	0.4	0.7	10	1	466.33	0.1428
50	0.8	0.01	1	1	0.03	0.04	0.4	0.3	10	1	427.09	0.052
50	0.99	0.2	1	1	0.03	0.04	0.4	0.8	10	1	748.33	0.0292
50	0.3	0.4	1	1	0.03	0.04	0.4	0.9	10	1	340.37	0.0133
50	0.8	0.01	1	1	0.03	0.04	0.4	0.9	10	1	498.92	0.2535
50	0.2	0.4	1	1	0.03	0.04	0.4	0.7	10	1	311.28	0.0109
50	0.5	0.99	1	1	0.03	0.04	0.4	0.7	10	1	1150.7	0.155
50	0.2	0.9	1	1	0.03	0.04	0.4	0.7	10	1	458.14	0.0312
50	0.2	0.6	1	1	0.03	0.04	0.4	0.2	10	1	371.18	0.0248
50	0.1	0.9	1	1	0.03	0.04	0.4	0.6	10	1	382.65	0.0214
50	0.8	0.3	1	1	0.03	0.04	0.4	0.8	10	1	515.17	0.0367
50	0.8	0.01	1	1	0.03	0.04	0.4	0.8	10	1	492.14	0.2186
50	0.3	0.99	1	1	0.03	0.04	0.4	0.7	10	1	1019.7	0.146
50	0.2	0.5	1	1	0.03	0.04	0.4	0.3	10	1	329.68	0.0172
50	0.3	0.4	1	1	0.03	0.04	0.4	0.3	10	1	377.98	0.0248
50	0.2	0.2	1	1	0.03	0.04	0.4	0.9	10	1	355.89	0.0234
50	0.8	0.9	1	1	0.03	0.04	0.4	0.2	10	1	1053	0.0494
50	0.2	0.01	1	1	0.03	0.04	0.4	0.2	10	1	377.34	0.0366
50	0.3	0.3	1	1	0.03	0.04	0.4	0.5	10	1	362.24	0.0203
50	0.01	0.1	1	1	0.03	0.04	0.4	0.2	10	1	292.9	0.0071
50	0.2	0.9	1	1	0.03	0.04	0.4	0.5	10	1	482.96	0.0504
50	0.8	0.01	1	1	0.03	0.04	0.4	0.4	10	1	456.35	0.0762
50	0.7	0.01	1	1	0.03	0.04	0.4	0.4	10	1	445.72	0.0821
50	0.2	0.7	1	1	0.03	0.04	0.4	0	10	1	394.19	0.0398
50	0.01	0.9	1	1	0.03	0.04	0.4	0	10	1	452.41	0.1074
50	0.2	0.3	1	1	0.03	0.04	0.4	0	10	1	349.39	0.019
50	0.7	0.01	1	1	0.03	0.04	0.4	0.7	10	1	482.16	0.1646
50	0.2	0.6	1	1	0.03	0.04	0.4	0	10	1	391.93	0.0332
50	0.1	0.3	1	1	0.03	0.04	0.4	0.8	10	1	263.79	0.004
50	0.3	0.3	1	1	0.03	0.04	0.4	0.2	10	1	366	0.0195
50	0.2	0.01	1	1	0.03	0.04	0.4	0.1	10	1	364.72	0.0308
50	0.9	0.1	1	1	0.03	0.04	0.4	0.9	10	1	629.74	0.1198
50	0.5	0.01	1	1	0.03	0.04	0.4	0.4	10	1	438.59	0.0758
50	0.01	0.8	1	1	0.03	0.04	0.4	0.2	10	1	279.95	0.0184
50	0.2	0.3	1	1	0.03	0.04	0.4	0.1	10	1	359.25	0.0223
50	0.2	0.8	1	1	0.03	0.04	0.4	0	10	1	434.51	0.0583
50	0.7	0.01	1	1	0.03	0.04	0.4	0.2	10	1	387.75	0.0328
50	0.2	0.2	1	1	0.03	0.04	0.4	0.1	10	1	358.33	0.0216
50	0.1	0.4	1	1	0.03	0.04	0.4	0.7	10	1	270.16	0.0042
50	0.7	0.01	1	1	0.03	0.04	0.4	0.3	10	1	436.67	0.062
50	0.5	0.01	1	1	0.03	0.04	0.4	0.8	10	1	489.87	0.1776
50	0.2	0.5	1	1	0.03	0.04	0.4	0.2	10	1	353.58	0.0211
50	0.3	0.1	1	1	0.03	0.04	0.4	0.3	10	1	371.53	0.0269
50	0.7	0.01	1	1	0.03	0.04	0.4	0.5	10	1	460.1	0.1052
50	0.7	0.01	1	1	0.03	0.04	0.4	0.8	10	1	485.69	0.2012
50	0.2	0.8	1	1	0.03	0.04	0.4	0.1	10	1	439.57	0.0576
50	0.5	0.01	1	1	0.03	0.04	0.4	0.5	10	1	463.86	0.1006
50	0.2	0.5	1	1	0.03	0.04	0.4	0	10	1	356.49	0.0263
50	0.6	0.1	1	1	0.03	0.04	0.4	0.5	10	1	423.55	0.0445
50	0.7	0.01	1	1	0.03	0.04	0.4	0.9	10	1	489.03	0.2325
50	0.1	0.5	1	1	0.03	0.04	0.4	0.4	10	1	299.24	0.0108
50	0.1	0.4	1	1	0.03	0.04	0.4	0.6	10	1	275.54	0.0072
50	0.2	0.7	1	1	0.03	0.04	0.4	0.1	10	1	395.19	0.0358
50	0.3	0.1	1	1	0.03	0.04	0.4	0.5	10	1	390.5	0.0339
50	0.01	0.3	1	1	0.03	0.04	0.4	0.2	10	1	279.16	0.0072
50	0.3	0.3	1	1	0.03	0.04	0.4	0.4	10	1	353.15	0.0193
50	0.5	0.01	1	1	0.03	0.04	0.4	0.6	10	1	482.7	0.131
50	0.8	0.9	1	1	0.03	0.04	0.4	0.1	10	1	1043.4	0.0478
50	0.1	0.8	1	1	0.03	0.04	0.4	0.1	10	1	412.39	0.0543
50	0.3	0.3	1	1	0.03	0.04	0.4	0.7	10	1	361.9	0.0209
50	0.7	0.01	1	1	0.03	0.04	0.4	0.6	10	1	497.6	0.144
50	0.1	0.8	1	1	0.03	0.04	0.4	0	10	1	422.67	0.0632
50	0.3	0.1	1	1	0.03	0.04	0.4	0.6	10	1	419.32	0.0408
50	0.99	0.01	1	1	0.03	0.04	0.4	0.8	10	1	506.87	0.2381
50	0.01	0.7	1	1	0.03	0.04	0.4	0.1	10	1	291.06	0.0209
50	0.01	0.1	1	1	0.03	0.04	0.4	0	10	1	320.77	0.0131
50	0.3	0.3	1	1	0.03	0.04	0.4	0.3	10	1	363.3	0.0183
50	0.3	0.3	1	1	0.03	0.04	0.4	0.6	10	1	360.18	0.0202
50	0.2	0.5	1	1	0.03	0.04	0.4	0.4	10	1	344.69	0.0149
50	0.5	0.99	1	1	0.03	0.04	0.4	0.3	10	1	1085.7	0.1965
50	0.3	0.3	1	1	0.03	0.04	0.4	0.1	10	1	368.86	0.0236
50	0.2	0.7	1	1	0.03	0.04	0.4	0.2	10	1	398.27	0.0304
50	0.1	0.3	1	1	0.03	0.04	0.4	0.9	10	1	268.72	0.0035
50	0.01	0.1	1	1	0.03	0.04	0.4	0.5	10	1	255.59	0.0038
50	0.9	0.01	1	1	0.03	0.04	0.4	0.8	10	1	491.48	0.2294
50	0.01	0.3	1	1	0.03	0.04	0.4	0.3	10	1	251.7	0.0038
50	0.8	0.9	1	1	0.03	0.04	0.4	0	10	1	1073.2	0.0497
50	0.2	0.4	1	1	0.03	0.04	0.4	0.2	10	1	356.99	0.0173
50	0.01	0.4	1	1	0.03	0.04	0.4	0	10	1	312.04	0.0188
50	0.1	0.3	1	1	0.03	0.04	0.4	0.7	10	1	281.4	0.0063
50	0.1	0.9	1	1	0.03	0.04	0.4	0.5	10	1	399.44	0.033
50	0.01	0.3	1	1	0.03	0.04	0.4	0.4	10	1	237.9	0.0023
50	0.1	0.99	1	1	0.03	0.04	0.4	0.9	10	1	477.21	0.0146
50	0.2	0.4	1	1	0.03	0.04	0.4	0	10	1	362.63	0.0205
50	0.1	0.8	1	1	0.03	0.04	0.4	0.3	10	1	365.82	0.0326
50	0.2	0.3	1	1	0.03	0.04	0.4	0.3	10	1	356.16	0.0191
50	0.2	0.3	1	1	0.03	0.04	0.4	0.9	10	1	323.07	0.0112
50	0.99	0.01	1	1	0.03	0.04	0.4	0.7	10	1	544.19	0.2029
50	0.7	0.2	1	1	0.03	0.04	0.4	0.8	10	1	488.08	0.0553
50	0.01	0.1	1	1	0.03	0.04	0.4	0.9	10	1	206.54	0.0001
50	0.1	0.5	1	1	0.03	0.04	0.4	0.2	10	1	338.24	0.019
50	0.9	0.9	1	1	0.03	0.04	0.4	0.5	10	1	1219.8	0.0183
50	0.8	0.01	1	1	0.03	0.04	0.4	0.6	10	1	482.75	0.1436
50	0.01	0.9	1	1	0.03	0.04	0.4	0.1	10	1	390.83	0.0655
50	0.1	0.5	1	1	0.03	0.04	0.4	0.3	10	1	317.57	0.0144
50	0.2	0.3	1	1	0.03	0.04	0.4	0.7	10	1	333.93	0.0145
50	0.7	0.2	1	1	0.03	0.04	0.4	0.9	10	1	499.49	0.065
50	0.3	0.2	1	1	0.03	0.04	0.4	0.6	10	1	376.25	0.0244
50	0.2	0.3	1	1	0.03	0.04	0.4	0.2	10	1	350.71	0.019
50	0.1	0.4	1	1	0.03	0.04	0.4	0.3	10	1	301.98	0.0139
50	0.2	0.2	1	1	0.03	0.04	0.4	0	10	1	350.57	0.0196
50	0.1	0.2	1	1	0.03	0.04	0.4	0.9	10	1	288.54	0.0057
50	0.1	0.7	1	1	0.03	0.04	0.4	0	10	1	376.62	0.0445
50	0.2	0.1	1	1	0.03	0.04	0.4	0	10	1	351.69	0.0203
50	0.4	0.01	1	1	0.03	0.04	0.4	0.6	10	1	472.21	0.1175
50	0.1	0.8	1	1	0.03	0.04	0.4	0.2	10	1	392.73	0.0421
50	0.1	0.9	1	1	0.03	0.04	0.4	0.4	10	1	431.54	0.0449
50	0.4	0.01	1	1	0.03	0.04	0.4	0.5	10	1	435.69	0.0876
50	0.2	0.9	1	1	0.03	0.04	0.4	0.1	10	1	536.47	0.1022
50	0.8	0.01	1	1	0.03	0.04	0.4	0.5	10	1	488.16	0.1135
50	0.1	0.5	1	1	0.03	0.04	0.4	0.5	10	1	300.94	0.0092
50	0.1	0.5	1	1	0.03	0.04	0.4	0	10	1	345.45	0.0259
50	0.01	0.2	1	1	0.03	0.04	0.4	0.5	10	1	226.27	0.0012
50	0.1	0.3	1	1	0.03	0.04	0.4	0.6	10	1	295.43	0.0081
50	0.2	0.2	1	1	0.03	0.04	0.4	0.8	10	1	377.61	0.0242
50	0.1	0.9	1	1	0.03	0.04	0.4	0.2	10	1	465.54	0.0817
50	0.3	0.2	1	1	0.03	0.04	0.4	0.9	10	1	371.55	0.0295
50	0.3	0.2	1	1	0.03	0.04	0.4	0.7	10	1	379.16	0.0275
50	0.3	0.2	1	1	0.03	0.04	0.4	0.2	10	1	356.12	0.0211
50	0.01	0.6	1	1	0.03	0.04	0.4	0.1	10	1	292.78	0.017
50	0.01	0.1	1	1	0.03	0.04	0.4	0.8	10	1	213.64	0.0008
50	0.3	0.2	1	1	0.03	0.04	0.4	0.8	10	1	378.01	0.0297
50	0.1	0.5	1	1	0.03	0.04	0.4	0.1	10	1	352.59	0.0216
50	0.9	0.9	1	1	0.03	0.04	0.4	0.1	10	1	1236.1	0.0209
50	0.2	0.9	1	1	0.03	0.04	0.4	0.4	10	1	517.58	0.0615
50	0.9	0.01	1	1	0.03	0.04	0.4	0.7	10	1	498.99	0.1896
50	0.2	0.2	1	1	0.03	0.04	0.4	0.3	10	1	346.28	0.0185
50	0.1	0.2	1	1	0.03	0.04	0.4	0.7	10	1	305.88	0.0088
50	0.9	0.9	1	1	0.03	0.04	0.4	0.6	10	1	1296.9	0.0222
50	0.1	0.4	1	1	0.03	0.04	0.4	0.2	10	1	326.19	0.0159
50	0.9	0.01	1	1	0.03	0.04	0.4	0.6	10	1	501.38	0.1498
50	0.3	0.1	1	1	0.03	0.04	0.4	0.8	10	1	428.29	0.0493
50	0.01	0.4	1	1	0.03	0.04	0.4	0.1	10	1	295.74	0.0119
50	0.7	0.99	1	1	0.03	0.04	0.4	0.9	10	1	1478.8	0.1157
50	0.9	0.9	1	1	0.03	0.04	0.4	0.2	10	1	1256.2	0.0196
50	0.7	0.99	1	1	0.03	0.04	0.4	0	10	1	1400.2	0.1856
50	0.2	0.2	1	1	0.03	0.04	0.4	0.4	10	1	350.29	0.0187
50	0.01	0.7	1	1	0.03	0.04	0.4	0	10	1	358.76	0.037
50	0.6	0.99	1	1	0.03	0.04	0.4	0.4	10	1	1219.8	0.1792
50	0.6	0.99	1	1	0.03	0.04	0.4	0	10	1	1172.4	0.2073
50	0.6	0.99	1	1	0.03	0.04	0.4	0.1	10	1	1184.1	0.1999
50	0.99	0.01	1	1	0.03	0.04	0.4	0.6	10	1	574.07	0.1588
50	0.6	0.99	1	1	0.03	0.04	0.4	0.5	10	1	1234.8	0.1656
50	0.1	0.1	1	1	0.03	0.04	0.4	0.5	10	1	342.86	0.0204
50	0.3	0.2	1	1	0.03	0.04	0.4	0.3	10	1	357.09	0.0207
50	0.01	0.1	1	1	0.03	0.04	0.4	0.6	10	1	235.1	0.0013
50	0.1	0.4	1	1	0.03	0.04	0.4	0	10	1	340.12	0.0218
50	0.9	0.9	1	1	0.03	0.04	0.4	0.4	10	1	1260.2	0.0221
50	0.99	0.9	1	1	0.03	0.04	0.4	0.1	10	1	1483.8	0.0018
50	0.1	0.2	1	1	0.03	0.04	0.4	0.6	10	1	308.1	0.0107
50	0.1	0.9	1	1	0.03	0.04	0.4	0.1	10	1	499.11	0.0975
50	0.1	0.1	1	1	0.03	0.04	0.4	0.4	10	1	351.69	0.0201
50	0.1	0.2	1	1	0.03	0.04	0.4	0.5	10	1	317.21	0.0121
50	0.9	0.01	1	1	0.03	0.04	0.4	0.4	10	1	497.92	0.0741
50	0.01	0.01	1	1	0.03	0.04	0.4	0.1	10	1	354.37	0.0211
50	0.01	0.1	1	1	0.03	0.04	0.4	0.4	10	1	269.26	0.0046
50	0.2	0.1	1	1	0.03	0.04	0.4	0.6	10	1	382.26	0.0315
50	0.01	0.2	1	1	0.03	0.04	0.4	0.3	10	1	278.44	0.0055
50	0.01	0.01	1	1	0.03	0.04	0.4	0.4	10	1	361.42	0.0203
50	0.99	0.9	1	1	0.03	0.04	0.4	0.9	10	1	1702.7	0.0059
50	0.1	0.9	1	1	0.03	0.04	0.4	0	10	1	481.37	0.1105
50	0.2	0.2	1	1	0.03	0.04	0.4	0.5	10	1	348.51	0.0203
50	0.99	0.01	1	1	0.03	0.04	0.4	0.3	10	1	488.12	0.0175
50	0.01	0.8	1	1	0.03	0.04	0.4	0.1	10	1	330.08	0.0341
50	0.1	0.3	1	1	0.03	0.04	0.4	0.3	10	1	326.86	0.0137
50	0.9	0.01	1	1	0.03	0.04	0.4	0.5	10	1	508.18	0.1125
50	0.99	0.01	1	1	0.03	0.04	0.4	0.5	10	1	589.85	0.1005
50	0.2	0.99	1	1	0.03	0.04	0.4	0	10	1	725.78	0.2295
50	0.01	0.9	1	1	0.03	0.04	0.4	0.2	10	1	353.14	0.0386
50	0.1	0.4	1	1	0.03	0.04	0.4	0.1	10	1	336.65	0.0181
50	0.3	0.2	1	1	0.03	0.04	0.4	0.5	10	1	374.91	0.0241
50	0.6	0.99	1	1	0.03	0.04	0.4	0.3	10	1	1192.4	0.1826
50	0.01	0.6	1	1	0.03	0.04	0.4	0	10	1	325.11	0.0276
50	0.1	0.1	1	1	0.03	0.04	0.4	0.9	10	1	350.36	0.0221
50	0.3	0.1	1	1	0.03	0.04	0.4	0.9	10	1	439.93	0.0597
50	0.1	0.3	1	1	0.03	0.04	0.4	0.4	10	1	318.12	0.0114
50	0.1	0.2	1	1	0.03	0.04	0.4	0.3	10	1	323.19	0.014
50	0.99	0.1	1	1	0.03	0.04	0.4	0.7	10	1	716.44	0.0502
50	0.99	0.2	1	1	0.03	0.04	0.4	0.9	10	1	832.82	0.0477
50	0.1	0.99	1	1	0.03	0.04	0.4	0.4	10	1	742.22	0.1404
50	0.1	0.1	1	1	0.03	0.04	0.4	0.7	10	1	355.67	0.0205
50	0.99	0.1	1	1	0.03	0.04	0.4	0.8	10	1	799.76	0.08
50	0.6	0.99	1	1	0.03	0.04	0.4	0.2	10	1	1208.4	0.1963
50	0.1	0.99	1	1	0.03	0.04	0.4	0.2	10	1	744.58	0.2023
50	0.9	0.9	1	1	0.03	0.04	0.4	0	10	1	1248.3	0.0203
50	0.01	0.2	1	1	0.03	0.04	0.4	0.4	10	1	246.3	0.0018
50	0.1	0.3	1	1	0.03	0.04	0.4	0.2	10	1	329.43	0.0176
50	0.2	0.1	1	1	0.03	0.04	0.4	0.5	10	1	389.78	0.0309
50	0.01	0.1	1	1	0.03	0.04	0.4	0.3	10	1	285.97	0.0065
50	0.01	0.2	1	1	0.03	0.04	0.4	0.2	10	1	276.57	0.0059
50	0.6	0.99	1	1	0.03	0.04	0.4	0.7	10	1	1253.2	0.1492
50	0.99	0.4	1	1	0.03	0.04	0.4	0.9	10	1	703.94	0.0149
50	0.1	0.3	1	1	0.03	0.04	0.4	0	10	1	361	0.0209
50	0.6	0.99	1	1	0.03	0.04	0.4	0.8	10	1	1256.3	0.1369
50	0.01	0.8	1	1	0.03	0.04	0.4	0	10	1	364.77	0.056
50	0.1	0.1	1	1	0.03	0.04	0.4	0.3	10	1	352.16	0.0215
50	0.2	0.2	1	1	0.03	0.04	0.4	0.7	10	1	359.06	0.0202
50	0.01	0.5	1	1	0.03	0.04	0.4	0.3	10	1	245.28	0.0045
50	0.01	0.5	1	1	0.03	0.04	0.4	0	10	1	311.13	0.022
50	0.2	0.1	1	1	0.03	0.04	0.4	0.9	10	1	395.74	0.0416
50	0.01	0.3	1	1	0.03	0.04	0.4	0	10	1	309.31	0.0138
50	0.1	0.1	1	1	0.03	0.04	0.4	0.8	10	1	340.19	0.0205
50	0.3	0.01	1	1	0.03	0.04	0.4	0	10	1	341.09	0.0193
50	0.1	0.2	1	1	0.03	0.04	0.4	0.4	10	1	327.11	0.0146
50	0.1	0.9	1	1	0.03	0.04	0.4	0.3	10	1	470.99	0.067
50	0.99	0.9	1	1	0.03	0.04	0.4	0.7	10	1	1710.5	0.0041
50	0.01	0.01	1	1	0.03	0.04	0.4	0.6	10	1	367.91	0.0222
50	0.2	0.2	1	1	0.03	0.04	0.4	0.6	10	1	370.22	0.0209
50	0.3	0.1	1	1	0.03	0.04	0.4	0	10	1	346.02	0.0187
50	0.2	0.1	1	1	0.03	0.04	0.4	0.1	10	1	347.9	0.0201
50	0.3	0.1	1	1	0.03	0.04	0.4	0.1	10	1	357.2	0.0229
50	0.3	0.01	1	1	0.03	0.04	0.4	0.2	10	1	380.47	0.0396
50	0.01	0.3	1	1	0.03	0.04	0.4	0.1	10	1	302.66	0.012
50	0.2	0.99	1	1	0.03	0.04	0.4	0.1	10	1	777.24	0.2246
50	0.9	0.9	1	1	0.03	0.04	0.4	0.8	10	1	1208	0.02
50	0.2	0.99	1	1	0.03	0.04	0.4	0.8	10	1	888.44	0.0817
50	0.9	0.9	1	1	0.03	0.04	0.4	0.7	10	1	1205	0.0197
50	0.1	0.2	1	1	0.03	0.04	0.4	0.1	10	1	351.53	0.0176
50	0.2	0.1	1	1	0.03	0.04	0.4	0.7	10	1	380.41	0.0364
50	0.1	0.3	1	1	0.03	0.04	0.4	0.1	10	1	343.58	0.0185
50	0.2	0.2	1	1	0.03	0.04	0.4	0.2	10	1	365.38	0.0208
50	0.99	0.1	1	1	0.03	0.04	0.4	0.9	10	1	822.56	0.115
50	0.1	0.99	1	1	0.03	0.04	0.4	0.1	10	1	705.11	0.2184
50	0.3	0.4	1	1	0.03	0.04	0.4	0.1	10	1	379.88	0.0214
50	0.1	0.1	1	1	0.03	0.04	0.4	0	10	1	336.27	0.0177
50	0.1	0.2	1	1	0.03	0.04	0.4	0.2	10	1	331.32	0.0154
50	0.1	0.99	1	1	0.03	0.04	0.4	0.6	10	1	764.57	0.0889
50	0.01	0.1	1	1	0.03	0.04	0.4	0.1	10	1	312.26	0.0139
50	0.1	0.99	1	1	0.03	0.04	0.4	0.8	10	1	602.89	0.0298
50	0.1	0.1	1	1	0.03	0.04	0.4	0.1	10	1	342.36	0.0187
50	0.1	0.2	1	1	0.03	0.04	0.4	0	10	1	357.45	0.0209
50	0.01	0.01	1	1	0.03	0.04	0.4	0.5	10	1	339.37	0.019
50	0.2	0.99	1	1	0.03	0.04	0.4	0.2	10	1	810.31	0.2104
50	0.6	0.01	1	1	0.03	0.04	0.4	0.6	10	1	476.46	0.1285
50	0.1	0.01	1	1	0.03	0.04	0.4	0	10	1	357.39	0.0222
50	0.3	0.1	1	1	0.03	0.04	0.4	0.7	10	1	408.73	0.0447
50	0.2	0.99	1	1	0.03	0.04	0.4	0.9	10	1	826.19	0.0538
50	0.2	0.1	1	1	0.03	0.04	0.4	0.4	10	1	374.92	0.029
50	0.99	0.9	1	1	0.03	0.04	0.4	0.8	10	1	1780	0.0055
50	0.2	0.1	1	1	0.03	0.04	0.4	0.2	10	1	363.49	0.0229
50	0.7	0.99	1	1	0.03	0.04	0.4	0.3	10	1	1462	0.1695
50	0.7	0.99	1	1	0.03	0.04	0.4	0.4	10	1	1462.1	0.164
50	0.2	0.99	1	1	0.03	0.04	0.4	0.6	10	1	887.9	0.1331
50	0.01	0.99	1	1	0.03	0.04	0.4	0.2	10	1	587.1	0.1307
50	0.1	0.01	1	1	0.03	0.04	0.4	0.4	10	1	398.5	0.0479
50	0.1	0.6	1	1	0.03	0.04	0.4	0.4	10	1	313.87	0.0135
50	0.1	0.01	1	1	0.03	0.04	0.4	0.1	10	1	367.29	0.0291
50	0.01	0.01	1	1	0.03	0.04	0.4	0.3	10	1	352.56	0.0199
50	0.7	0.99	1	1	0.03	0.04	0.4	0.1	10	1	1415.2	0.1791
50	0.1	0.1	1	1	0.03	0.04	0.4	0.2	10	1	352.67	0.0215
50	0.01	0.99	1	1	0.03	0.04	0.4	0.3	10	1	537.25	0.0805
50	0.99	0.9	1	1	0.03	0.04	0.4	0	10	1	1484.9	0.0009
50	0.3	0.01	1	1	0.03	0.04	0.4	0.3	10	1	414.39	0.054
50	0.1	0.1	1	1	0.03	0.04	0.4	0.6	10	1	370.05	0.0211
50	0.7	0.99	1	1	0.03	0.04	0.4	0.2	10	1	1446.5	0.1746
50	0.3	0.01	1	1	0.03	0.04	0.4	0.7	10	1	466.44	0.1231
50	0.3	0.01	1	1	0.03	0.04	0.4	0.8	10	1	467.18	0.1386
50	0.1	0.01	1	1	0.03	0.04	0.4	0.5	10	1	454.18	0.0679
50	0.7	0.99	1	1	0.03	0.04	0.4	0.6	10	1	1454	0.1449
50	0.01	0.01	1	1	0.03	0.04	0.4	0.8	10	1	354.06	0.0219
50	0.3	0.3	1	1	0.03	0.04	0.4	0.9	10	1	360.47	0.0223
50	0.2	0.01	1	1	0.03	0.04	0.4	0	10	1	327.14	0.0216
50	0.3	0.1	1	1	0.03	0.04	0.4	0.2	10	1	358.7	0.0268
50	0.3	0.3	1	1	0.03	0.04	0.4	0.8	10	1	366.38	0.0197
50	0.99	0.9	1	1	0.03	0.04	0.4	0.4	10	1	1593.7	0.0018
50	0.1	0.99	1	1	0.03	0.04	0.4	0.7	10	1	714.96	0.0544
50	0.7	0.99	1	1	0.03	0.04	0.4	0.5	10	1	1477.2	0.151
50	0.99	0.9	1	1	0.03	0.04	0.4	0.3	10	1	1540.9	0.0023
50	0.2	0.1	1	1	0.03	0.04	0.4	0.8	10	1	402.49	0.0384
50	0.3	0.01	1	1	0.03	0.04	0.4	0.6	10	1	445.76	0.1006
50	0.01	0.2	1	1	0.03	0.04	0.4	0.1	10	1	330.96	0.0124
50	0.3	0.01	1	1	0.03	0.04	0.4	0.1	10	1	367.67	0.0324
50	0.1	0.01	1	1	0.03	0.04	0.4	0.6	10	1	433.8	0.0716
50	0.1	0.01	1	1	0.03	0.04	0.4	0.9	10	1	465.08	0.1102
50	0.9	0.01	1	1	0.03	0.04	0.4	0.2	10	1	371.92	0.0156
50	0.1	0.99	1	1	0.03	0.04	0.4	0	10	1	672.85	0.2322
50	0.2	0.01	1	1	0.03	0.04	0.4	0.4	10	1	410.49	0.0588
50	0.2	0.99	1	1	0.03	0.04	0.4	0.3	10	1	797.38	0.1853
50	0.99	0.01	1	1	0.03	0.04	0.4	0.4	10	1	601.63	0.0575
50	0.99	0.9	1	1	0.03	0.04	0.4	0.5	10	1	1643.9	0.0032
50	0.3	0.01	1	1	0.03	0.04	0.4	0.4	10	1	410.46	0.0631
50	0.2	0.9	1	1	0.03	0.04	0.4	0.2	10	1	526.16	0.0845
50	0.1	0.01	1	1	0.03	0.04	0.4	0.7	10	1	461.16	0.0891
50	0.01	0.01	1	1	0.03	0.04	0.4	0.9	10	1	357.41	0.0202
50	0.2	0.9	1	1	0.03	0.04	0.4	0	10	1	535.54	0.1151
50	0.99	0.9	1	1	0.03	0.04	0.4	0.6	10	1	1711.1	0.0039
50	0.3	0.01	1	1	0.03	0.04	0.4	0.5	10	1	439.55	0.0819
50	0.4	0.01	1	1	0.03	0.04	0.4	0.3	10	1	412.52	0.0552
50	0.9	0.01	1	1	0.03	0.04	0.4	0.3	10	1	458.99	0.0399
50	0.2	0.01	1	1	0.03	0.04	0.4	0.8	10	1	453.81	0.1221
50	0.2	0.01	1	1	0.03	0.04	0.4	0.9	10	1	464.53	0.1431
50	0.4	0.01	1	1	0.03	0.04	0.4	0.4	10	1	433.15	0.0766
50	0.01	0.99	1	1	0.03	0.04	0.4	0	10	1	622.85	0.2305
50	0.8	0.99	1	1	0.03	0.04	0.4	0.7	10	1	1844.2	0.1069
50	0.1	0.99	1	1	0.03	0.04	0.4	0.3	10	1	744.6	0.1746
50	0.8	0.99	1	1	0.03	0.04	0.4	0.4	10	1	1861.3	0.1338
50	0.01	0.99	1	1	0.03	0.04	0.4	0.1	10	1	615.15	0.1812
50	0.8	0.99	1	1	0.03	0.04	0.4	0.6	10	1	1878.7	0.116
50	0.01	0.01	1	1	0.03	0.04	0.4	0	10	1	336.07	0.021
50	0.1	0.01	1	1	0.03	0.04	0.4	0.3	10	1	398.35	0.0404
50	0.7	0.99	1	1	0.03	0.04	0.4	0.8	10	1	1416.2	0.1162
50	0.8	0.99	1	1	0.03	0.04	0.4	0.5	10	1	1976	0.1295
50	0.1	0.99	1	1	0.03	0.04	0.4	0.5	10	1	771.4	0.1151
50	0.01	0.01	1	1	0.03	0.04	0.4	0.7	10	1	360.55	0.021
50	0.7	0.99	1	1	0.03	0.04	0.4	0.7	10	1	1460.9	0.137
50	0.2	0.01	1	1	0.03	0.04	0.4	0.3	10	1	398.74	0.0486
50	0.8	0.99	1	1	0.03	0.04	0.4	0	10	1	1912.1	0.1592
50	0.01	0.01	1	1	0.03	0.04	0.4	0.2	10	1	336.18	0.0206
50	0.8	0.99	1	1	0.03	0.04	0.4	0.9	10	1	1894.3	0.0992
50	0.8	0.99	1	1	0.03	0.04	0.4	0.1	10	1	1941.7	0.1546
50	0.8	0.99	1	1	0.03	0.04	0.4	0.2	10	1	1878.7	0.143
50	0.2	0.99	1	1	0.03	0.04	0.4	0.5	10	1	851.94	0.1543
50	0.2	0.01	1	1	0.03	0.04	0.4	0.5	10	1	424.59	0.0715
50	0.8	0.99	1	1	0.03	0.04	0.4	0.8	10	1	1921.9	0.1043
50	0.3	0.01	1	1	0.03	0.04	0.4	0.9	10	1	490.21	0.1703
50	0.9	0.99	1	1	0.03	0.04	0.4	0.9	10	1	2740.4	0.0621
50	0.2	0.99	1	1	0.03	0.04	0.4	0.7	10	1	947.39	0.1109
50	0.2	0.01	1	1	0.03	0.04	0.4	0.6	10	1	445.28	0.0895
50	0.8	0.99	1	1	0.03	0.04	0.4	0.3	10	1	1942.3	0.1397
50	0.2	0.01	1	1	0.03	0.04	0.4	0.7	10	1	468.77	0.1111
50	0.9	0.99	1	1	0.03	0.04	0.4	0	10	1	3155.3	0.1059
50	0.1	0.01	1	1	0.03	0.04	0.4	0.2	10	1	376.94	0.0361
50	0.1	0.01	1	1	0.03	0.04	0.4	0.8	10	1	442.34	0.0934
50	0.9	0.99	1	1	0.03	0.04	0.4	0.6	10	1	2809.6	0.0712
50	0.9	0.99	1	1	0.03	0.04	0.4	0.5	10	1	2900.4	0.0783
50	0.9	0.99	1	1	0.03	0.04	0.4	0.7	10	1	2904.2	0.0723
50	0.9	0.99	1	1	0.03	0.04	0.4	0.1	10	1	2986	0.0958
50	0.9	0.99	1	1	0.03	0.04	0.4	0.8	10	1	3063.4	0.07
50	0.9	0.99	1	1	0.03	0.04	0.4	0.2	10	1	3064.3	0.0958
50	0.9	0.99	1	1	0.03	0.04	0.4	0.3	10	1	3026.5	0.0927
50	0.9	0.99	1	1	0.03	0.04	0.4	0.4	10	1	3009.8	0.0861
50	0.99	0.99	1	1	0.03	0.04	0.4	0.8	10	1	10883	0.0204
50	0.99	0.99	1	1	0.03	0.04	0.4	0.7	10	1	11065	0.0197
50	0.99	0.99	1	1	0.03	0.04	0.4	0.9	10	1	10805	0.0193
50	0.99	0.99	1	1	0.03	0.04	0.4	0	10	1	10808	0.0175
50	0.99	0.99	1	1	0.03	0.04	0.4	0.3	10	1	11041	0.0206
50	0.99	0.99	1	1	0.03	0.04	0.4	0.6	10	1	10326	0.0167
50	0.99	0.99	1	1	0.03	0.04	0.4	0.2	10	1	11577	0.0226
50	0.99	0.99	1	1	0.03	0.04	0.4	0.4	10	1	10543	0.0185
50	0.99	0.99	1	1	0.03	0.04	0.4	0.1	10	1	10693	0.0192
50	0.99	0.99	1	1	0.03	0.04	0.4	0.5	10	1	11474	0.0191
50	0.6	0.3	1	1	0.03	0.04	0.4	0.9	10	1	444.29	0.0412
50	0.7	0.4	1	1	0.03	0.04	0.4	0.6	10	1	448.15	0.0226
50	0.6	0.4	1	1	0.03	0.04	0.4	0.9	10	1	443.94	0.029
50	0.7	0.5	1	1	0.03	0.04	0.4	0.8	10	1	456.02	0.0207
50	0.3	0.9	1	1	0.03	0.04	0.4	0.4	10	1	571.11	0.0744
